# Supplementary material for: Switching of the photophysical properties of Bodipy-derived trans bis(tributylphosphine) Pt(ii) bisacetylide complexes with rhodamine as the acid-activatable unit
Source: Royal Society of Chemistry journal article supplement (doi:10.1039/c4dt03373f), 2015-01-01
Supplement: c4dt03373f1.pdf [file c4dt03373f1.pdf]

**Electronic Supplementary Information for:**

**Switching of the Photophysical Properties of  
Bodipy-derived Trans Bis(tributylphosphine)  
Pt(II) bisacetylido Complexes with Rhodamine  
as the Acid-Activatable Unit**

*Poulomi Majumdar, Xiaoneng Cui, Kejing Xu and Jianzhang Zhao\**

State Key Laboratory of Fine Chemicals, School of Chemical Engineering, Dalian University of  
Technology, E-208 West Campus, 2 Ling-Gong Road, Dalian 116024, P. R. China.

E-mail: zhaojzh@dlut.edu.cn    Web: <http://finechem2.dlut.edu.cn/photochem>

**Table of Contents**

|                                                                                 |     |
|---------------------------------------------------------------------------------|-----|
| 1. General.....                                                                 | S2  |
| 2.0 NMR and HR MS spectra.....                                                  | S3  |
| 3.0 UV–Vis absorption spectra of the complex in different solvents .....        | S14 |
| 4.0 Emission Spectra, decay curve and Cyclic voltammogram of the complexes..... | S15 |
| 5.0 DFT calculations.....                                                       | S16 |
| 6.0 The <i>x, y, z</i> coordinates .....                                        | S25 |

## 1.0 General

### Singlet oxygen ( $^1\text{O}_2$ ) quantum yields ( $\Phi_\Delta$ )

$\Phi_\Delta$  value of the triplet photosensitizers were measured with methylene blue ( $\Phi_\Delta = 0.57$  in dichloromethane) as standard.<sup>39</sup> Quantum yields for singlet oxygen ( $^1\text{O}_2$ ) generation in  $\text{CH}_2\text{Cl}_2$  were determined by monitoring the photooxidation of 1,3-diphenylisobenzofuran (DPBF) sensitized by the Pt(II) complexes. 1,3-Diphenylisobenzofuran (DPBF) was used as the  $^1\text{O}_2$  scavenger, due to its fast reaction with  $^1\text{O}_2$ . The absorbance of DPBF was adjusted to around 1.0 at 414 nm in air saturated  $\text{CH}_2\text{Cl}_2$ . Then, the photosensitizer was added to cuvette and photosensitizer's absorbance was adjusted to around 0.2–0.3. Then, the cuvette was exposed to monochromatic light at the specific wavelength for 10 seconds depending on the efficiency of the triplet photosensitizers. The photosensitizer and MB were irradiated at the same wavelength. Absorbance was measured six times after each irradiation. Then, the slope of the curves of absorbance maxima of DPBF at 414 nm versus irradiation time for each photosensitizer were calculated. Singlet oxygen quantum yield ( $\Phi_\Delta$ ) were calculated according to the equation (eqn (1)):

$$\Phi_{\Delta\text{sam}} = \Phi_{\Delta\text{std}} \left( \frac{m_{\text{sam}}}{m_{\text{std}}} \right) \left( \frac{F_{\text{std}}}{F_{\text{sam}}} \right) \quad (\text{eqn 1})$$

where “sam” and “std” designate the “Pt(II) photosensitizers” and “MB”, respectively. “ $m$ ” is the slope of difference in change in absorbance of DPBF (at 414 nm) with the irradiation time, “ $F$ ” is the absorption correction factor, which is given by  $F = 1 - 10^{-\text{OD}}$  (OD is the optical density, i.e. absorbance at the irradiation wavelength).

## 2.0 NMR and HR MS spectra

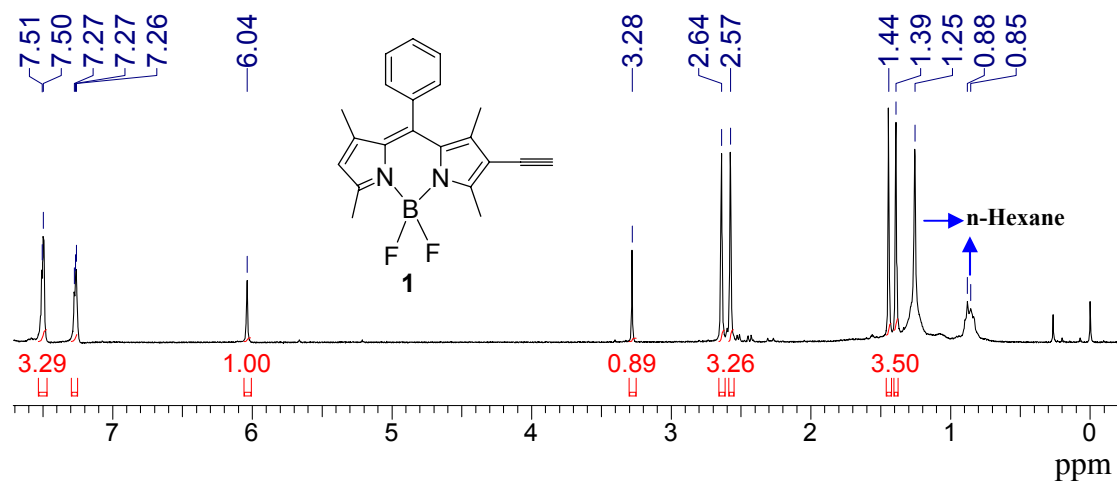

**Fig. S1** <sup>1</sup>H NMR of compound **1** (400 MHz, CDCl<sub>3</sub>).

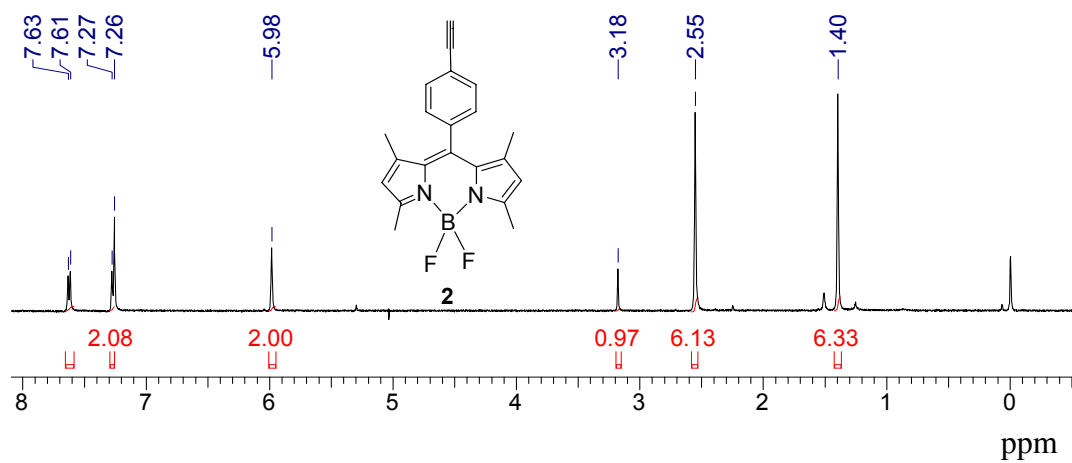

**Fig. S2** <sup>1</sup>H NMR of compound **2** (400 MHz, CDCl<sub>3</sub>).

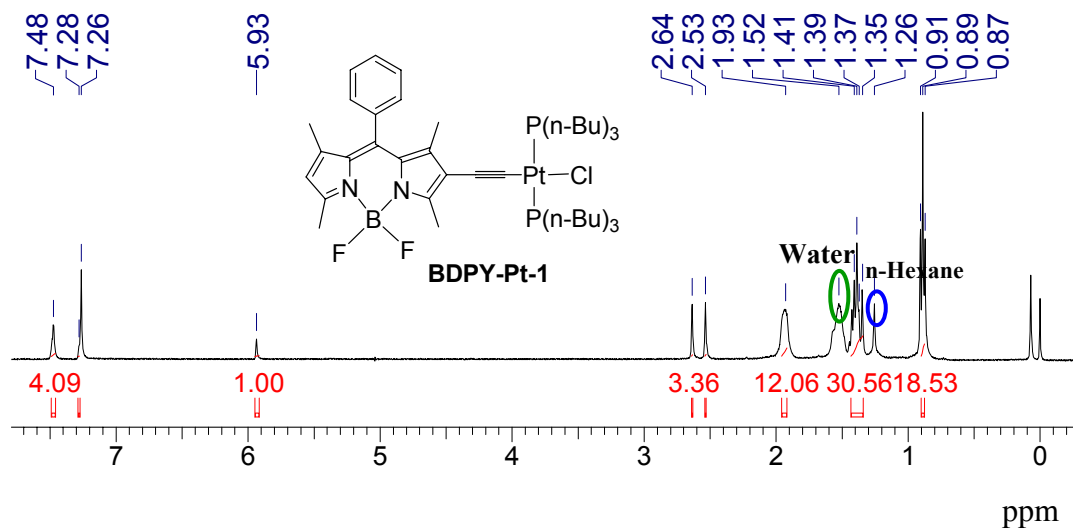

**Fig. S3** <sup>1</sup>H NMR (400 MHz, CDCl<sub>3</sub>) of complex **BDPY-Pt-1**.

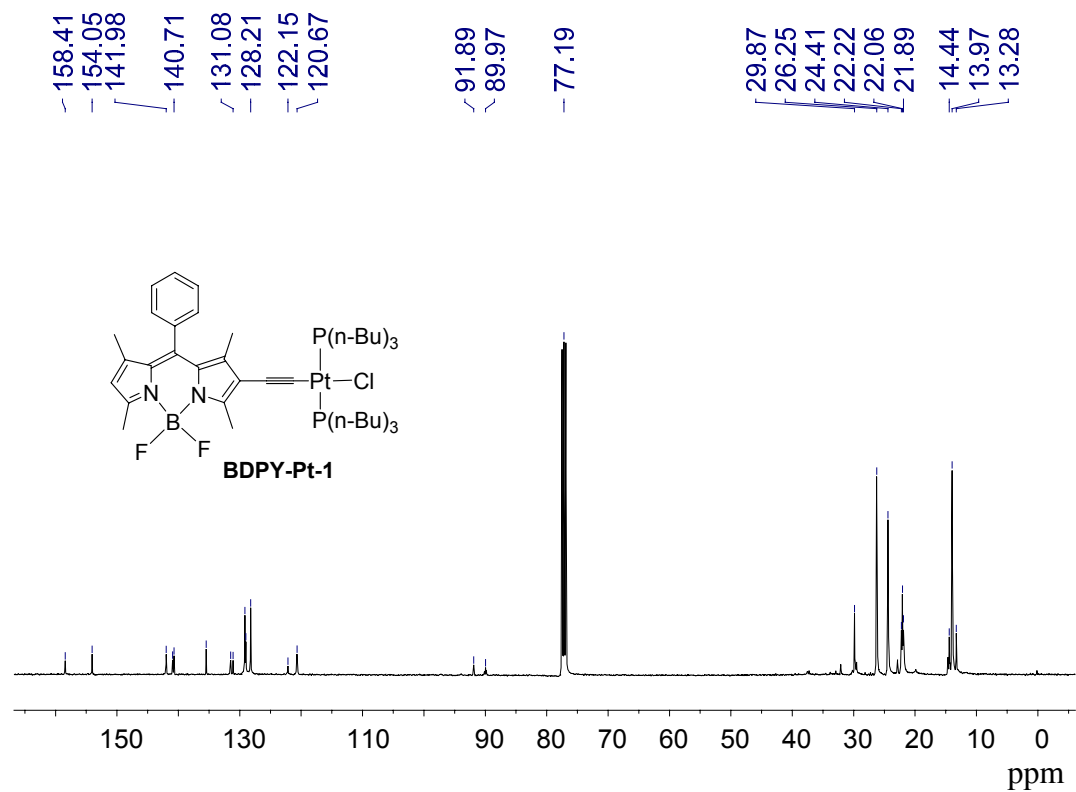

**Fig. S4** <sup>13</sup>C NMR (100 MHz, CDCl<sub>3</sub>) of **BDPY-Pt-1**.

JHR(CHCA)  
13062604 105 (1.749)

TOF LD+  
1.51e4

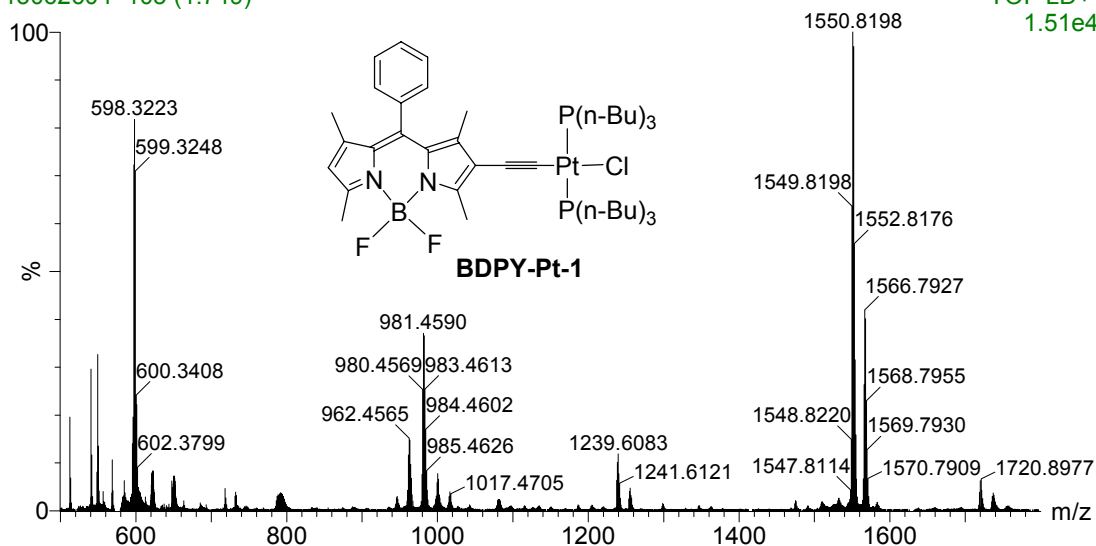

Fig. S5 MALDI-HRMS of **BDPY-Pt-1**.

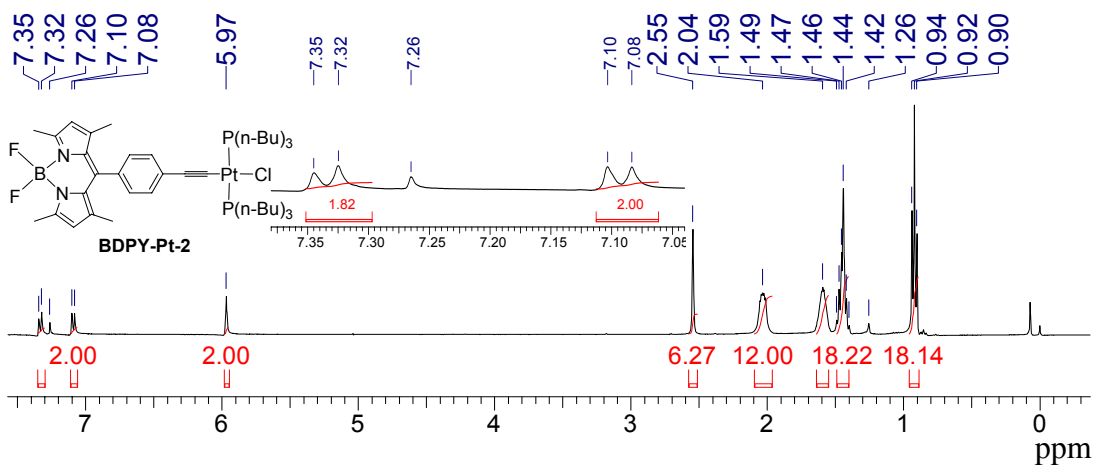

Fig. S6  $^1\text{H}$  NMR (400 MHz,  $\text{CDCl}_3$ ) of complex **BDPY-Pt-2**.

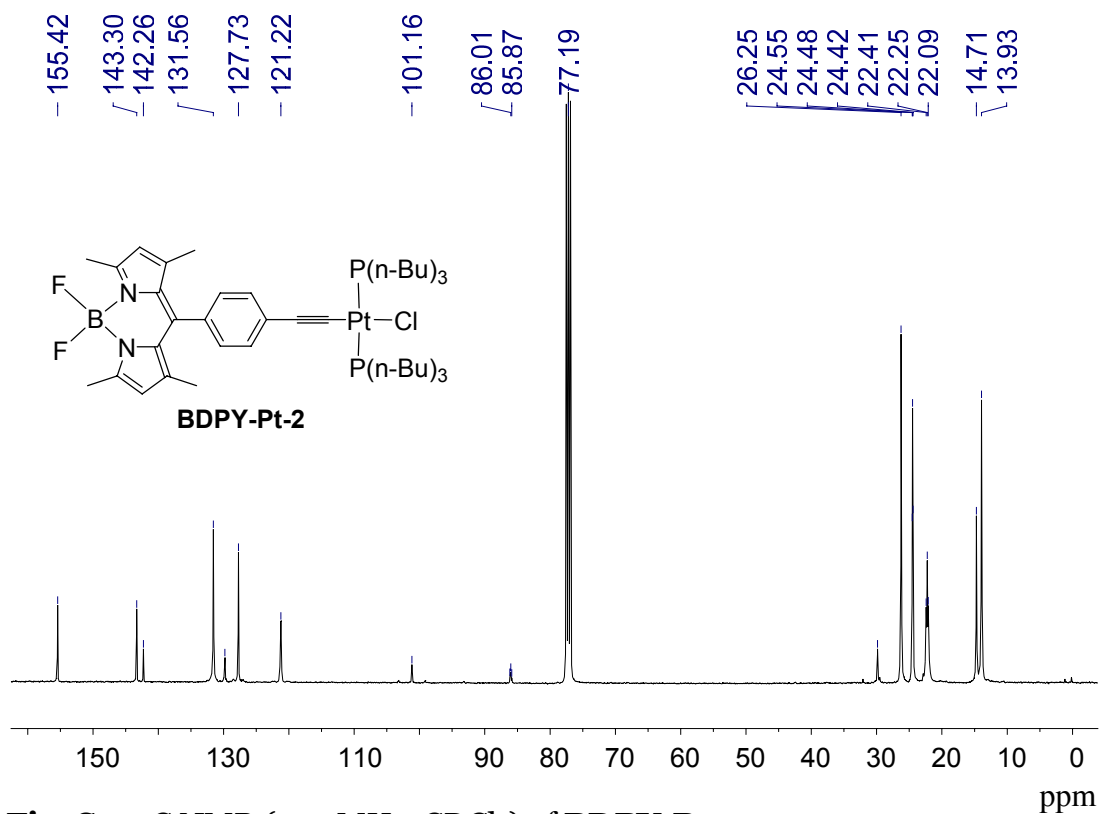

**Fig. S7** <sup>13</sup>C NMR (100 MHz, CDCl<sub>3</sub>) of **BDPY-Pt-2**.

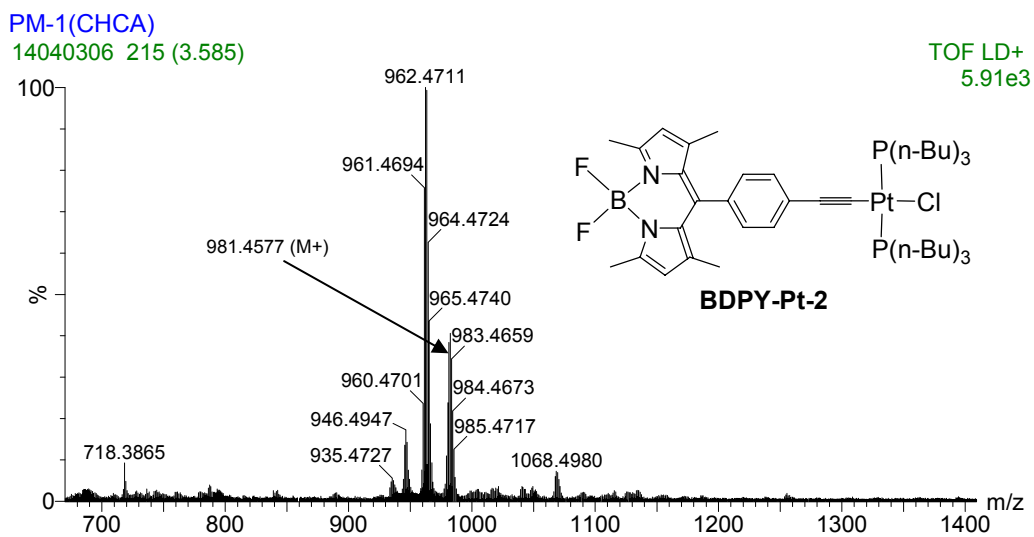

**Fig. S8** MALDI-HRMS of **BDPY-Pt-2**.

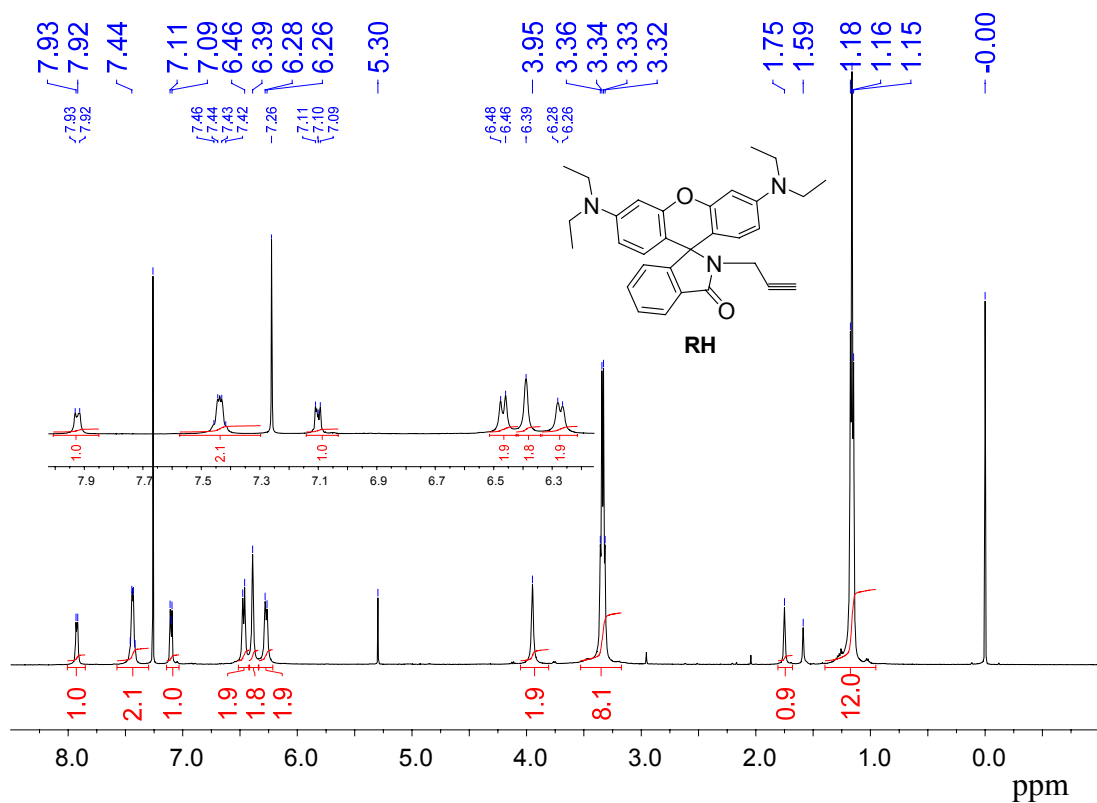

**Fig. S9** <sup>1</sup>H NMR (500 MHz, CDCl<sub>3</sub>) of RH.

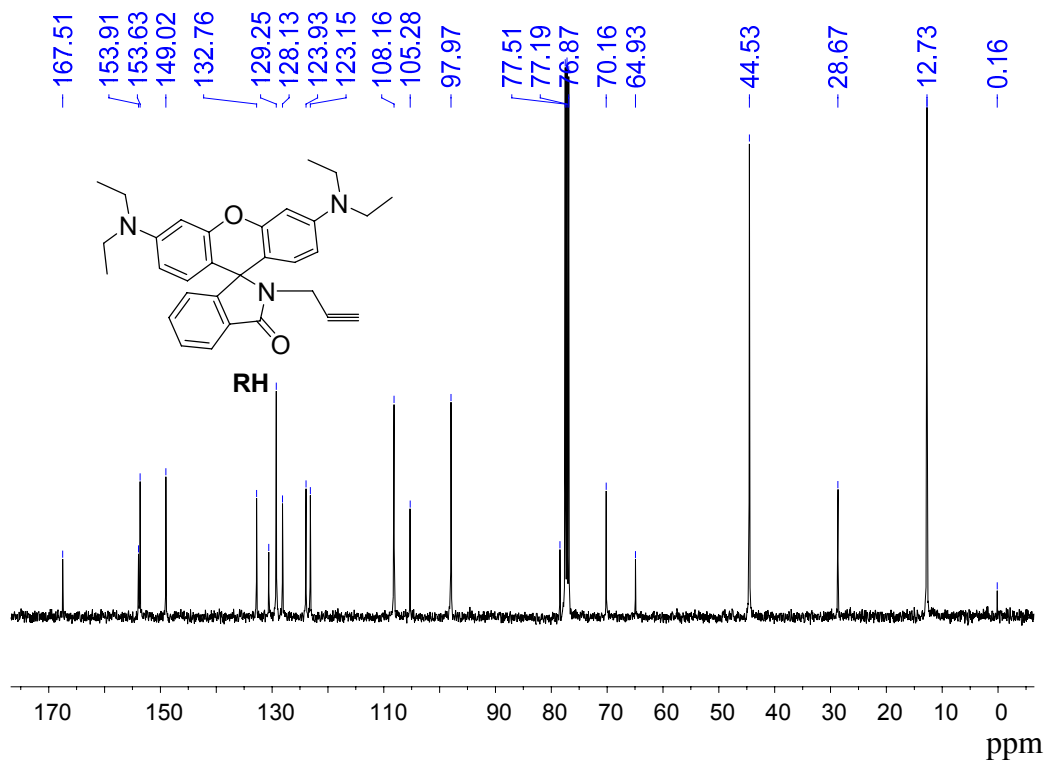

**Fig. S10**  $^{13}\text{C}$  NMR (125 MHz,  $\text{CDCl}_3$ ) of RH.

**Majumdar-479**

14042503 20 (0.371) AM (Cen,2, 80.00, Ht,5000.0,0.00,1.00); Sm (SG, 2x3.00); Cm (17:20) 1.97e3

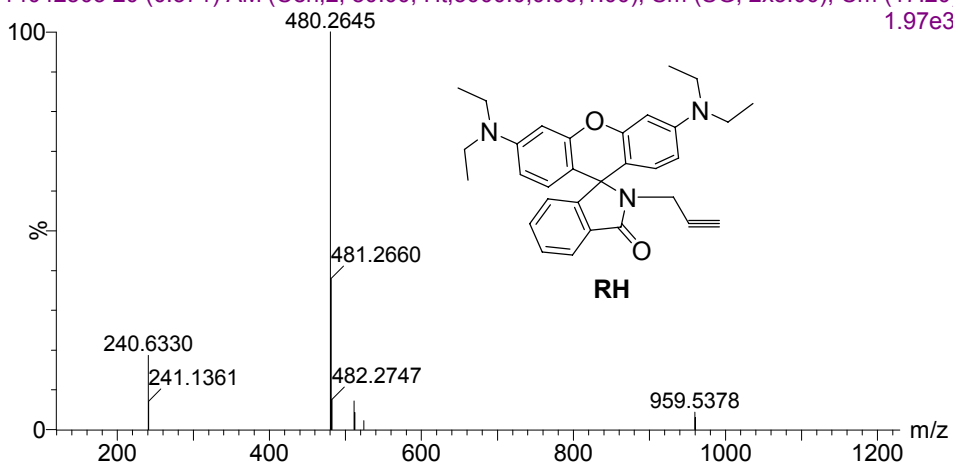

**Fig. S11** TOF ES+ HRMS of RH.



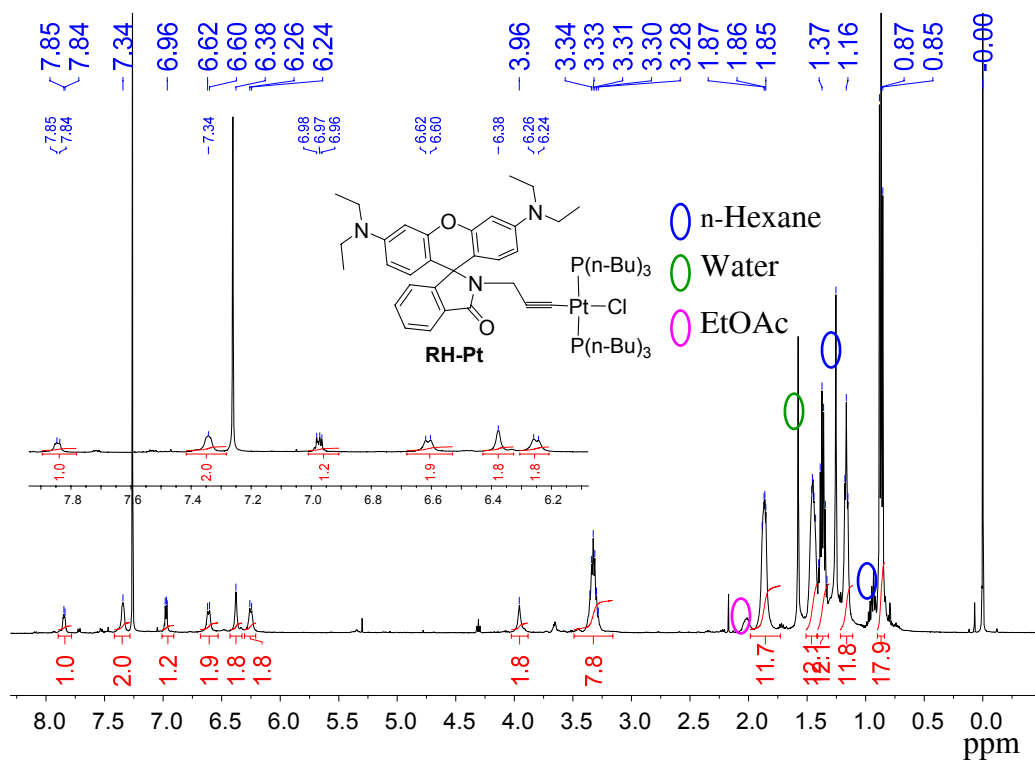

**Fig. S12** <sup>1</sup>H NMR (500 MHz, CDCl<sub>3</sub>) of RH-Pt.

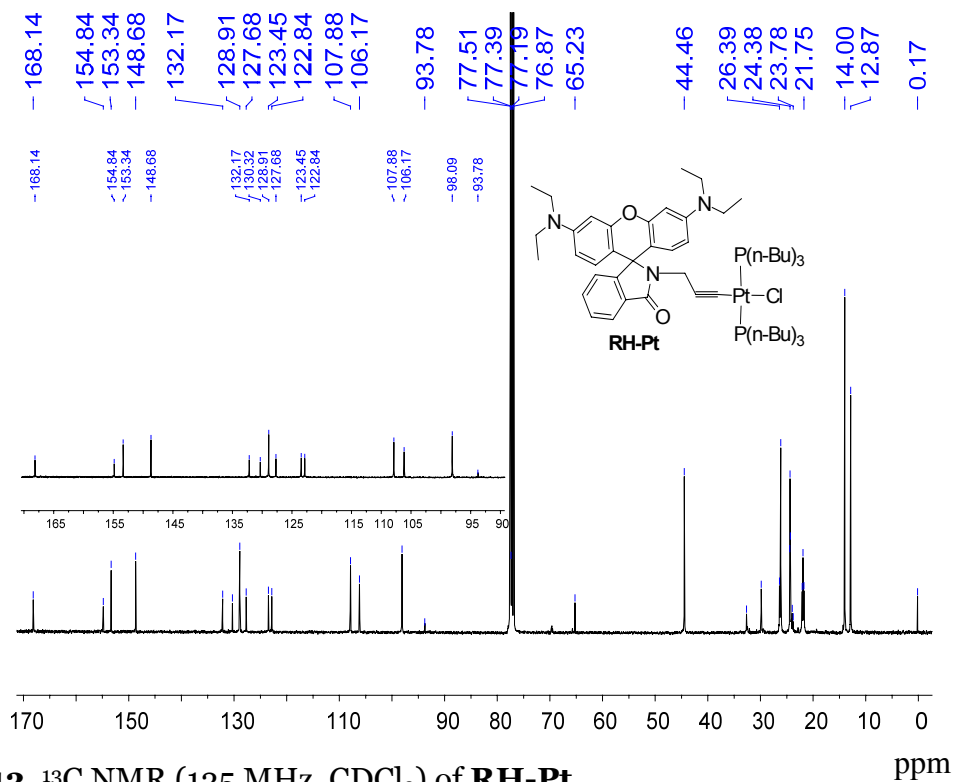

**Fig. S13** <sup>13</sup>C NMR (125 MHz, CDCl<sub>3</sub>) of RH-Pt.

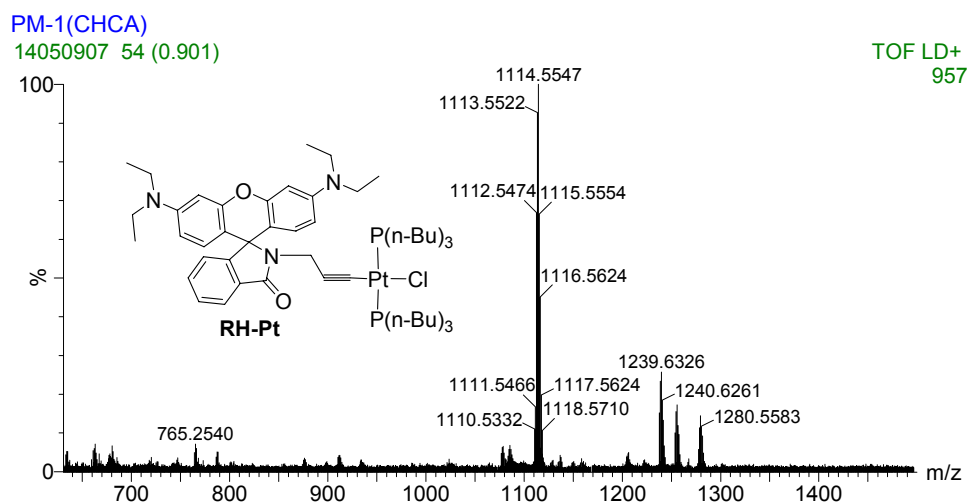

**Fig. S14** MALDI-HRMS of RH-Pt.

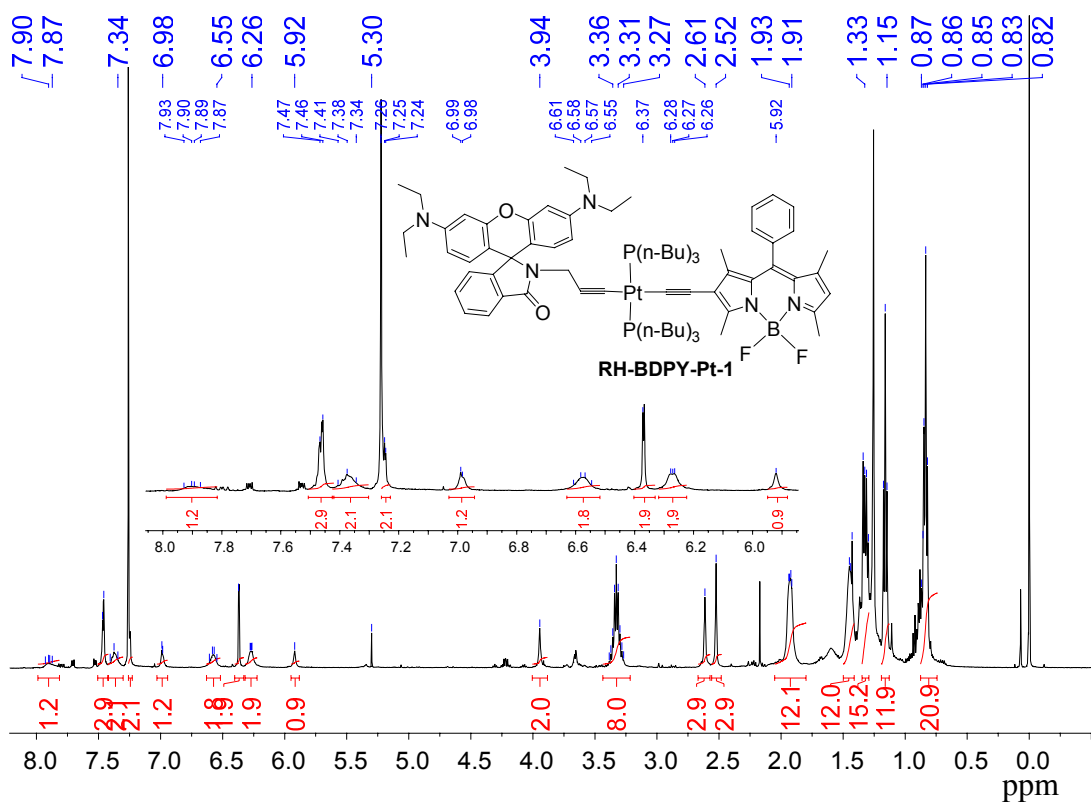

**Fig. S15**  $^1\text{H}$  NMR (500 MHz,  $\text{CDCl}_3$ ) of RH-BDPY-Pt-1.

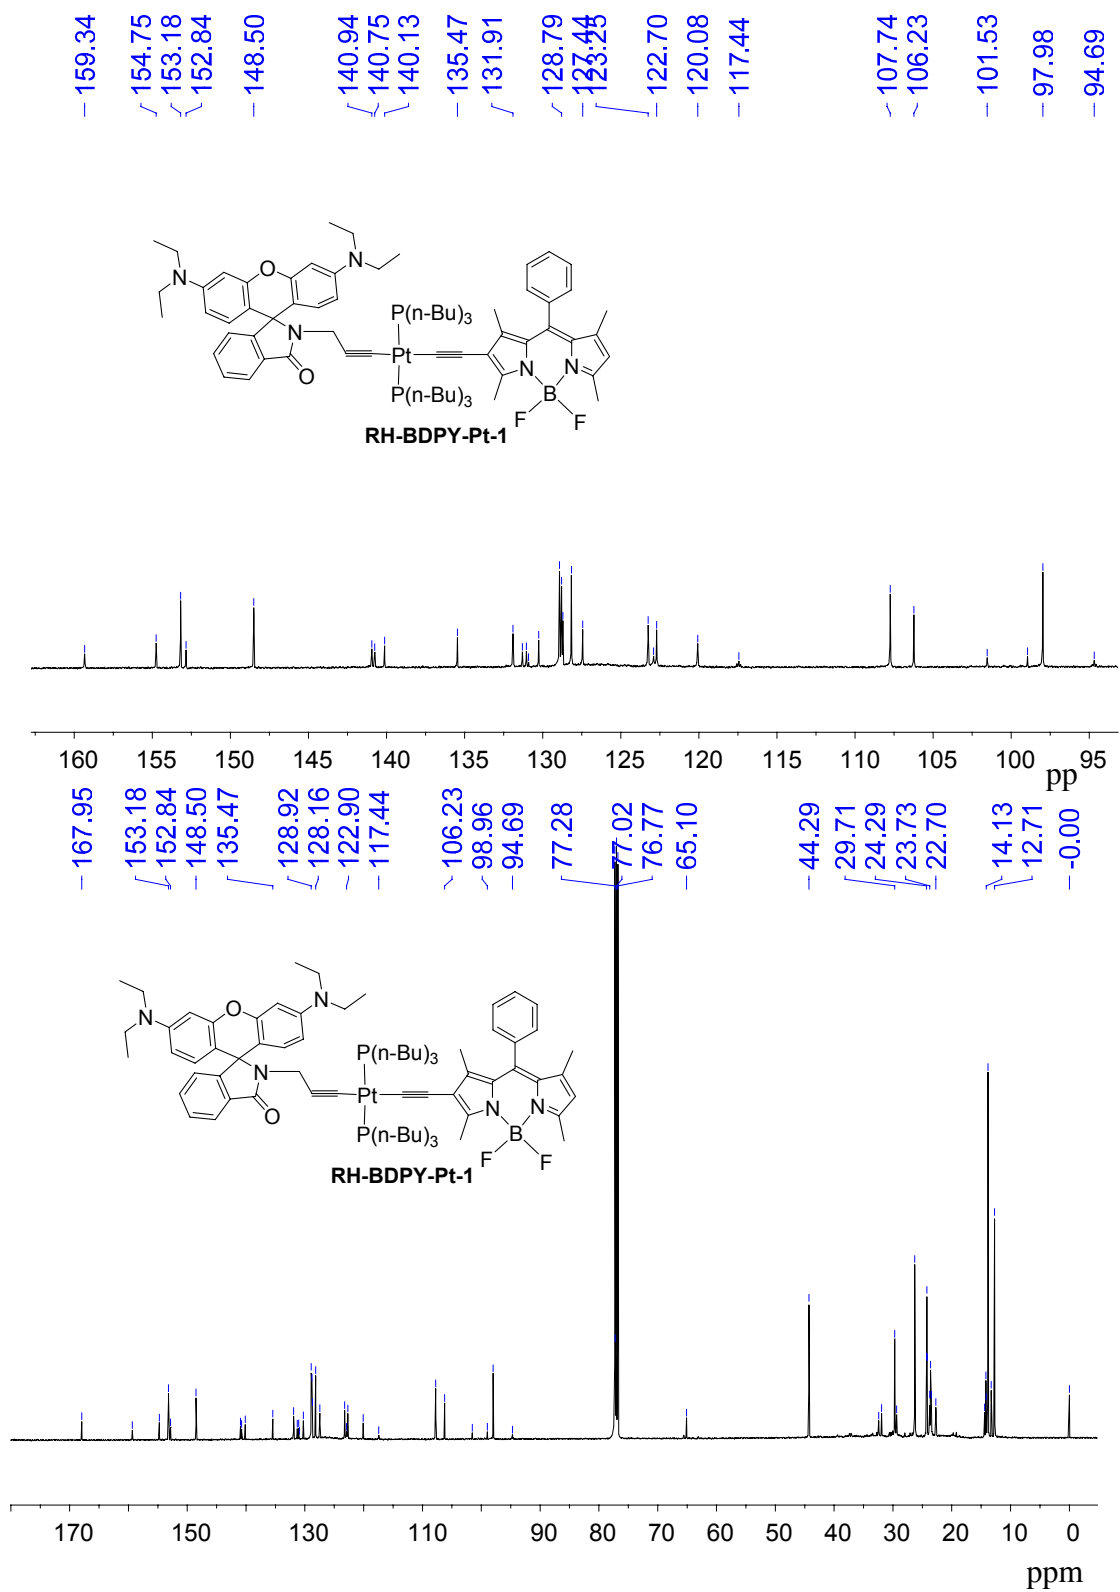

**Fig. S16** <sup>13</sup>C NMR (125 MHz, CDCl<sub>3</sub>) of **RH-BDPY-Pt-1**.

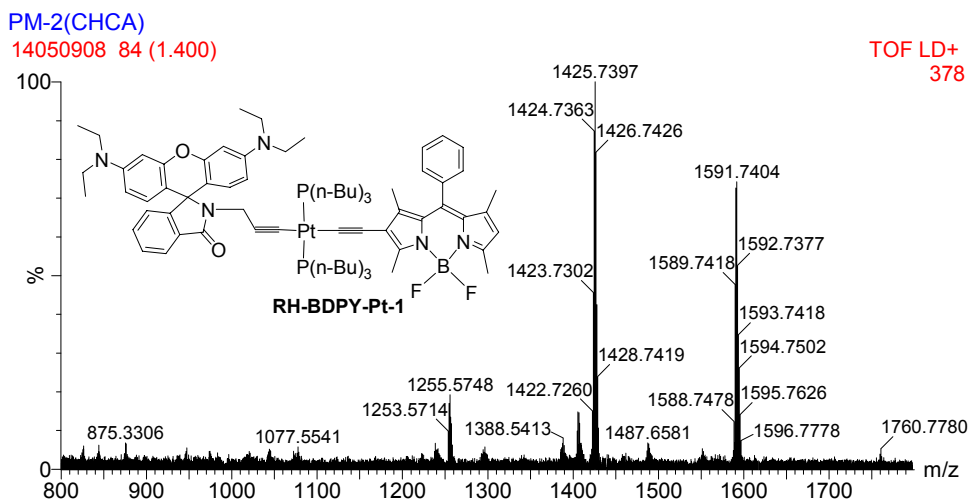

**Fig. S17** MALDI-HRMS of **RH-BDPY-Pt-1**.

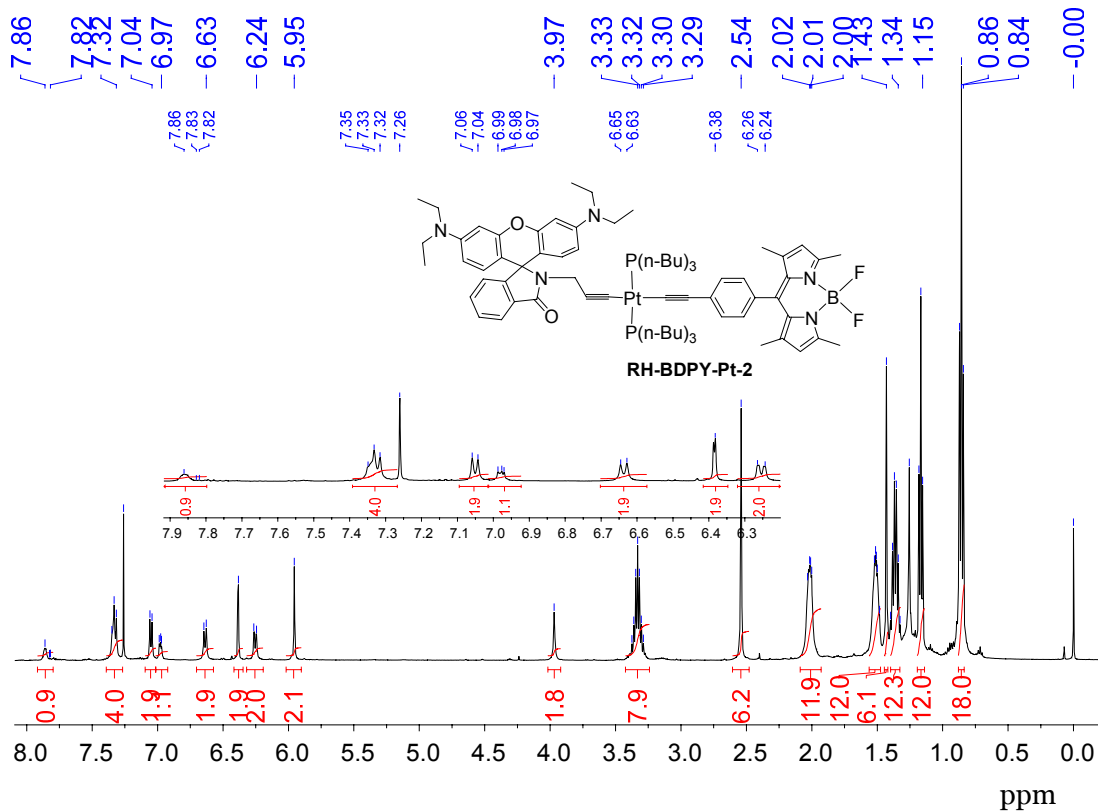

**Fig. S18**  $^1\text{H}$  NMR (500 MHz,  $\text{CDCl}_3$ ) of **RH-BDPY-Pt-2**.

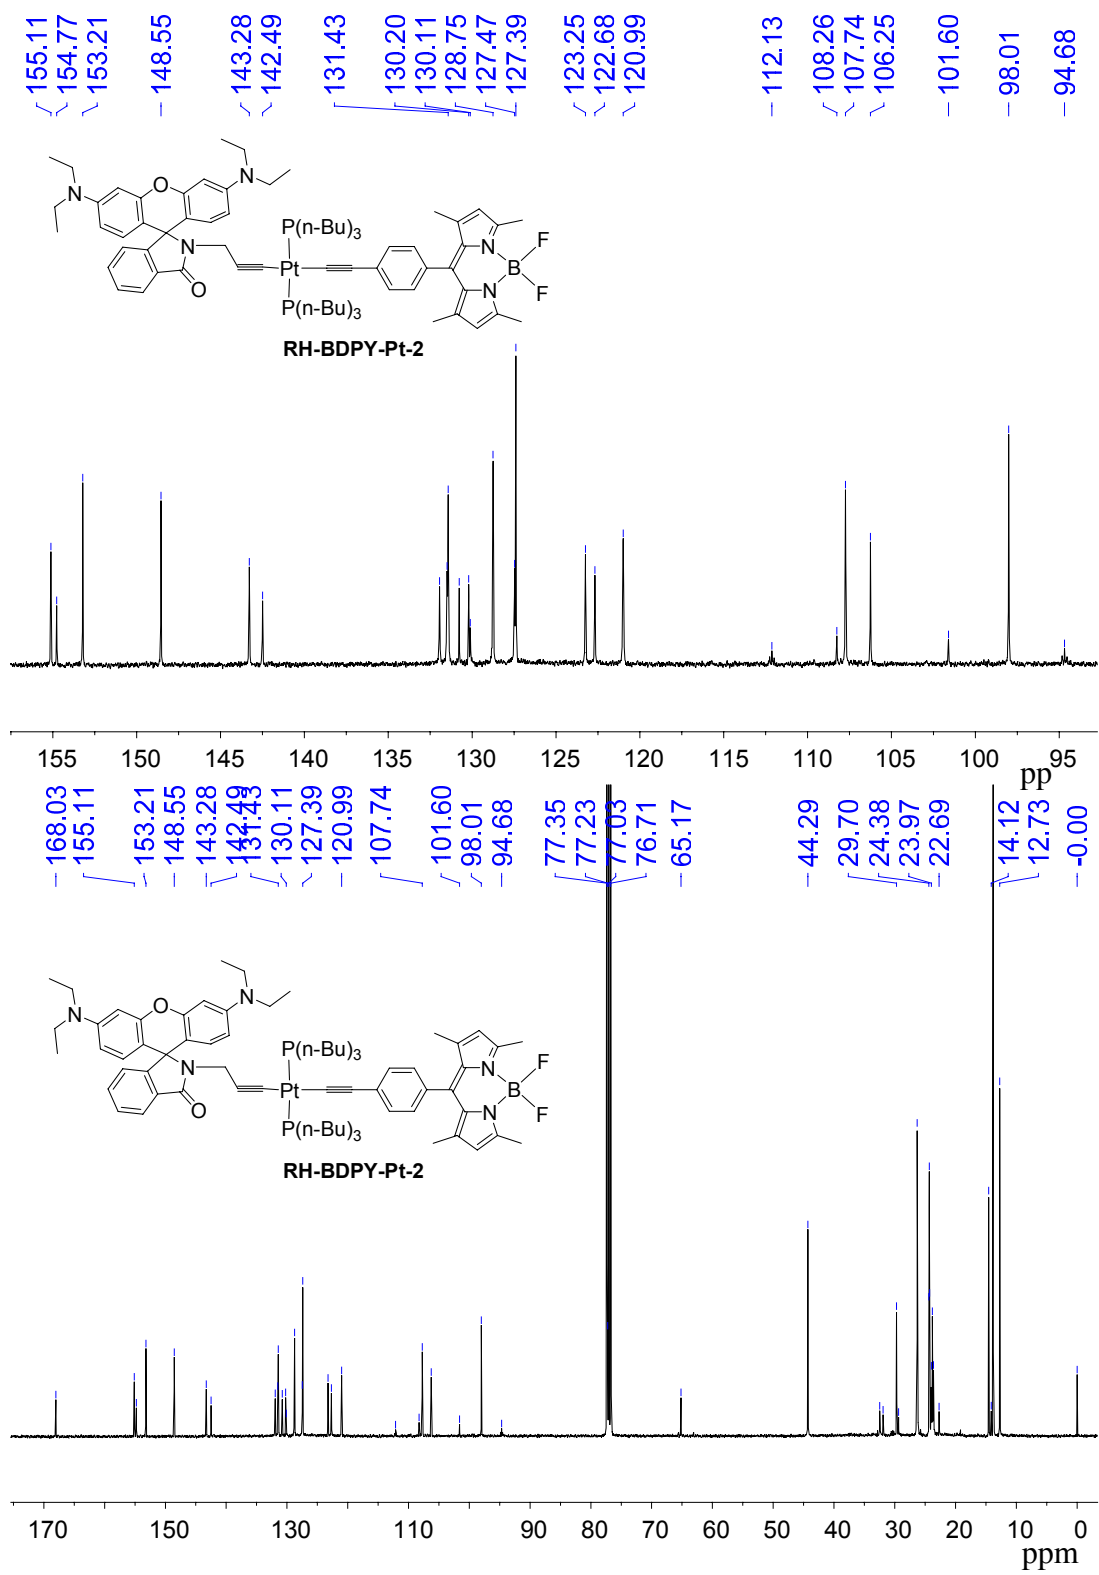

**Fig. S19** <sup>13</sup>C NMR (125 MHz, CDCl<sub>3</sub>) of **RH-BDPY-Pt-2**.

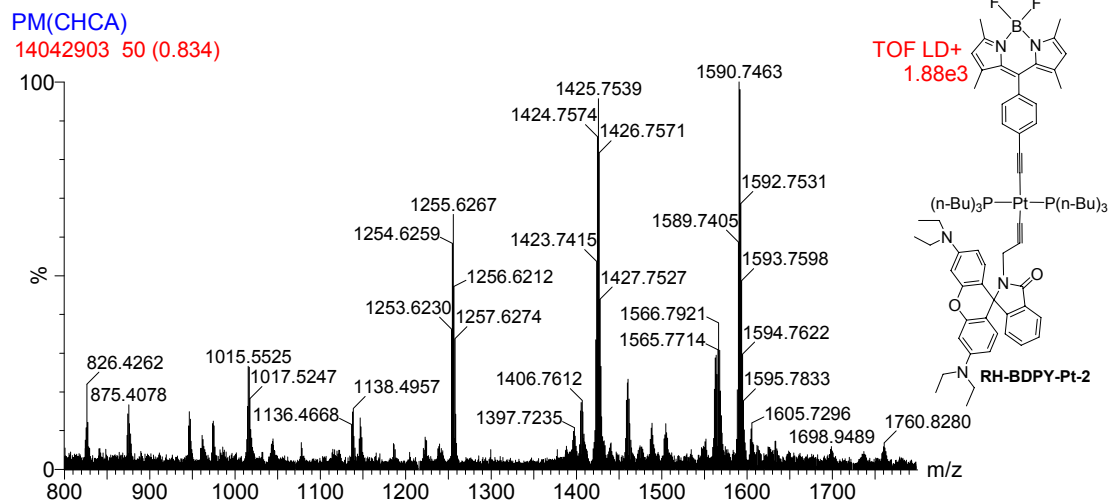

**Fig. S20** MALDI-HRMS of **RH-BDPY-Pt-2**.

### 3.0 UV-Vis absorption spectra of the complex in different solvents

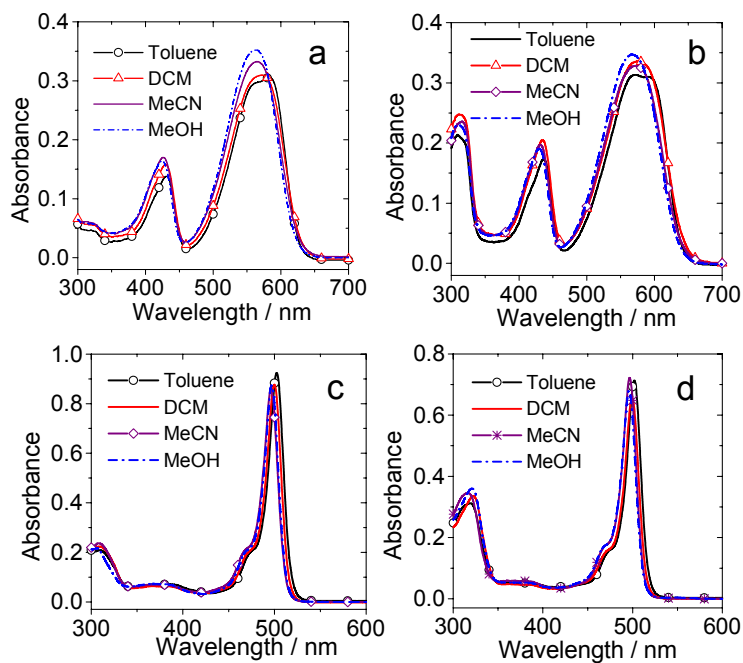

**Fig. S21** Solvent-polarity-dependence of the absorption of the complexes (a) **BDPY-Pt-1**, (b) **RH-BDPY-Pt-1**, (c) **BDPY-Pt-2**, (d) **RH-BDPY-Pt-2**.  $c = 1.0 \times 10^{-5}$  M. 20 °C.

#### 4.0 Emission Spectra, decay curve and Cyclic voltammogram of the complexes

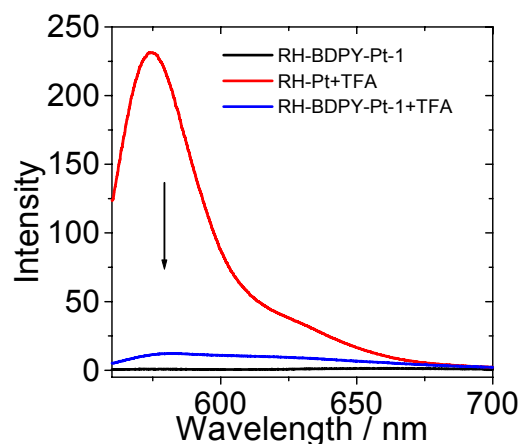

**Fig. S22** Emission of complexes. (a) **RH-BDPY-Pt-1** ( $c = 1.8 \times 10^{-5}$  M), **RH-Pt** ( $c = 1.0 \times 10^{-5}$  M) + **TFA** (333 eqv.) and **RH-BDPY-Pt-1** ( $c = 1 \times 10^{-5}$  M) + **TFA** (333 eqv.) ( $\lambda_{\text{ex}} = 550$  nm). in deaerated dichloromethane. 20 °C.

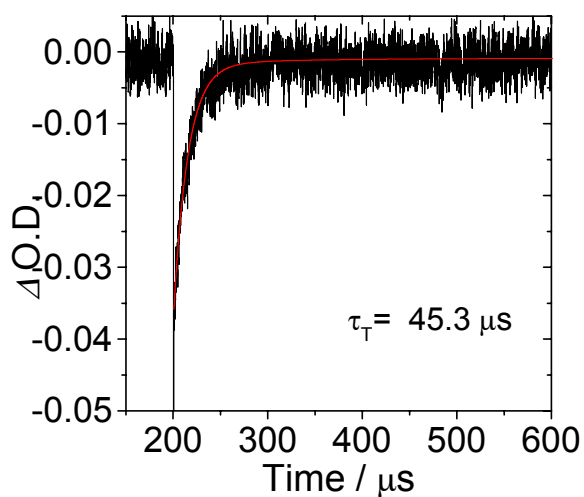

**Fig. S23** The decay curve of complexes **BDPY-Pt-1+TFA** (333 eqv.) at 580 nm (upon  $\lambda_{\text{ex}} = 532$  nm pulsed laser excitation).  $c = 1.0 \times 10^{-5}$  M in deaerated dichloromethane at 20 °C.

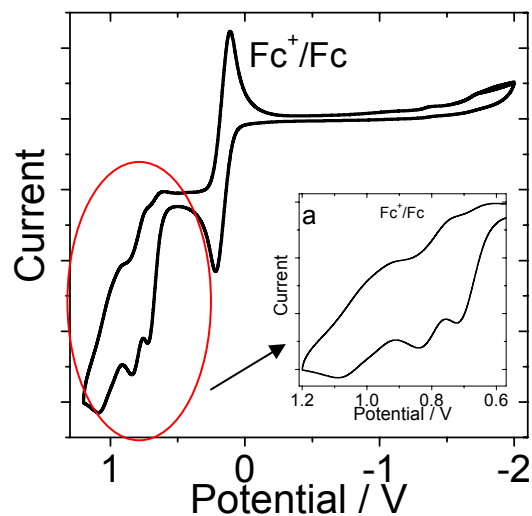

**Fig. S24** Cyclic voltammogram of (a) **RH-Pt** in deaerated  $\text{CH}_2\text{Cl}_2$  solutions containing 1.0 mM photosensitizers with the ferrocene(Fc) as internal reference, 0.10 M  $\text{Bu}_4\text{NPF}_6$  as supporting electrode,  $\text{Ag}/\text{AgNO}_3$  as reference electrode. Scan rates: 0.1 mV/s.

## 5.0 DFT Calculations

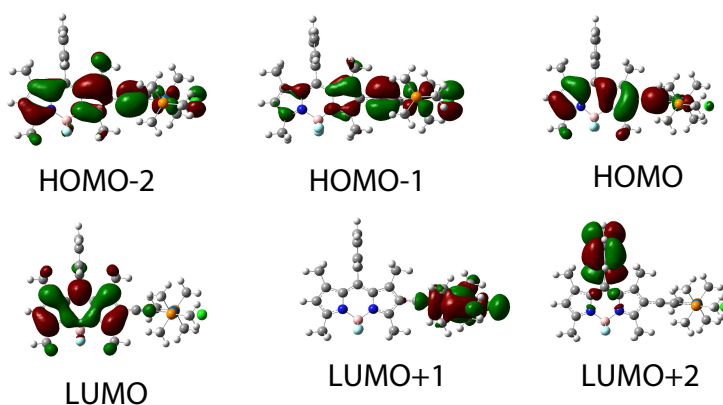

**Fig. S25** Electron density maps of the frontier molecular orbitals of complex **BDPY-Pt-1** based on the optimized ground state geometry. The solvent toluene was considered in the calculations (PCM model). Calculated at the B3LYP/GENCP/LANL2DZ level with Gaussian 09W.



**Table S1:** Excitation Energies (eV) and corresponding Oscillator Strengths ( $f$ ), main configurations and CI coefficients of the Low-lying Electronically Excited States of complex **BDPY-Pt-1**, Calculated by TDDFT//B3LYP/LANL2DZ, based on the DFT//B3LYP/LANL2DZ Optimized Ground State Geometries

|         |                                | TDDFT//B3LYP/LANL2DZ        |       |                          |                 |           |
|---------|--------------------------------|-----------------------------|-------|--------------------------|-----------------|-----------|
|         | Electronic transition          | Energy [eV/nm] <sup>a</sup> | $f^b$ | Composition <sup>c</sup> | CI <sup>d</sup> | Character |
| Singlet | S <sub>0</sub> →S <sub>1</sub> | 2.36 / 525                  | 0.458 | H →L                     | 0.684           | MLCT      |
|         | S <sub>0</sub> →S <sub>3</sub> | 3.06 / 405                  | 0.539 | H-2 →L                   | 0.627           | MLCT      |
| Triplet | S <sub>0</sub> →T <sub>1</sub> | 1.42 / 867                  | 0.668 | H →L                     | 0.000           | MLCT      |

<sup>a</sup> Only the selected low-lying excited states are presented. <sup>b</sup> Oscillator strengths. <sup>c</sup> Only the main configurations are presented. <sup>d</sup> The CI coefficients are in absolute values. <sup>e</sup> No spin-orbital coupling effect was considered, thus the  $f$  values are zero.

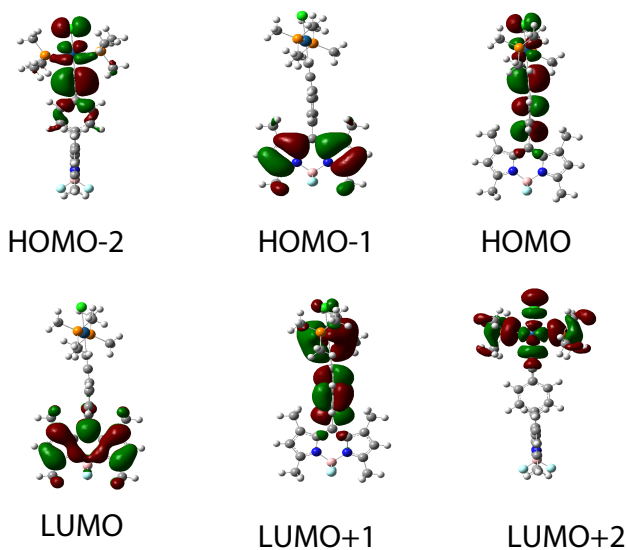

**Fig. S26** Electron density maps of the frontier molecular orbitals of complex **BDPY-Pt-2** based on the optimized ground state geometry. The solvent toluene was considered in the calculations (PCM model). Calculated at the B3LYP/GENCP/LANL2DZ level with Gaussian 09W.

**Table S2.** Excitation Energies (eV) and corresponding Oscillator Strengths ( $f$ ), main configurations and CI coefficients of the Low-lying Electronically Excited States of complex **BDPY-Pt-2**, Calculated by TDDFT//B3LYP/LANL2DZ, based on the DFT//B3LYP/LANL2DZ Optimized Ground State Geometries

| TDDFT//B3LYP/ LANL2DZ |                                |                             |                  |                          |                 |           |
|-----------------------|--------------------------------|-----------------------------|------------------|--------------------------|-----------------|-----------|
|                       | Electronic transition          | Energy [eV/nm] <sup>a</sup> | $f$ <sup>b</sup> | Composition <sup>c</sup> | CI <sup>d</sup> | Character |
| Singlet               | S <sub>0</sub> →S <sub>1</sub> | 2.26 / 548                  | 0.001            | H →L                     | 0.703           | MLCT      |
|                       | S <sub>0</sub> →S <sub>2</sub> | 2.80 / 442                  | 0.566            | H-1 →L                   | 0.696           | ILCT      |
|                       | S <sub>0</sub> →S <sub>6</sub> | 3.61 / 342                  | 1.013            | H →L+1                   | 0.681           | ILCT      |
| Triplet               | S <sub>0</sub> →T <sub>1</sub> | 1.53 / 809                  | 0.000            | H →L                     | 0.710           | MLCT      |

<sup>a</sup> Only the selected low-lying excited states are presented. <sup>b</sup> Oscillator strengths. <sup>c</sup> Only the main configurations are presented. <sup>d</sup> The CI coefficients are in absolute values. <sup>e</sup> No spin-orbital coupling effect was considered, thus the  $f$  values are zero.

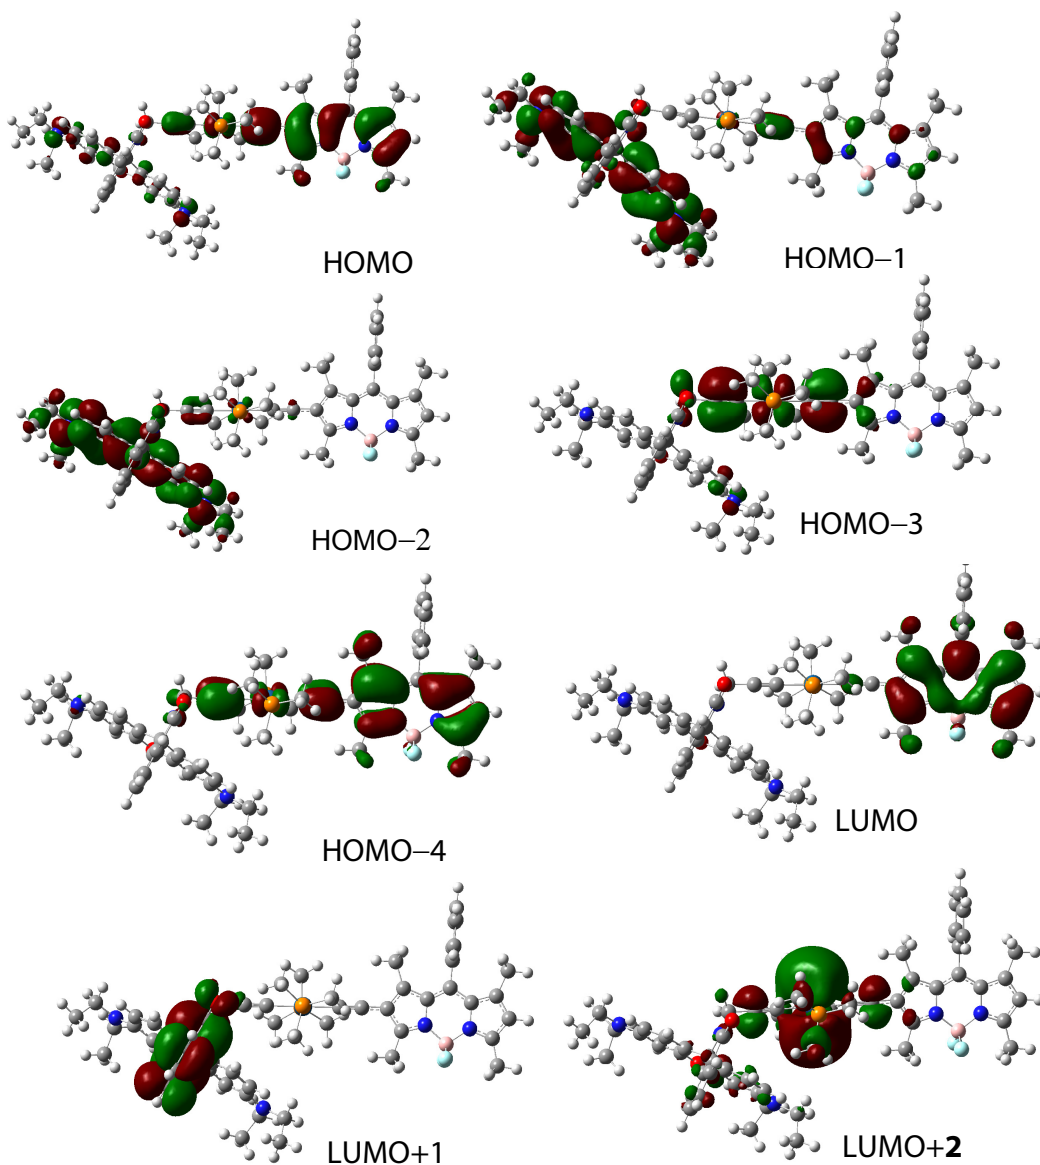

**Fig. S27** Electron density maps of the frontier molecular orbital of the complex **RH-BDPY-Pt-1** in dichloromethane. Based on ground state optimized geometry by the DFT calculations at the B3LYP/GENECP level with Gaussian 09W.

**Table S3.** Electronic excitation energies (eV) and corresponding oscillator strengths ( $f$ ), main configurations and CI coefficients of the low-lying electronic excited states of the complex **RH-BDPY-Pt-1** in dichloromethane calculated by TDDFT//B3LYP/GENECP based on the DFT//B3LYP/ GENECP optimized ground state geometries

| TDDFT//B3LYP/ GENECP |                                 |                             |       |                          |                 |           |
|----------------------|---------------------------------|-----------------------------|-------|--------------------------|-----------------|-----------|
|                      | Electronic transition           | Energy [eV/nm] <sup>a</sup> | $f^b$ | Composition <sup>c</sup> | CI <sup>d</sup> | Character |
| Singlet              | S <sub>0</sub> →S <sub>1</sub>  | 2.28/543                    | 0.417 | H→L                      | 0.667           | MLCT/ILCT |
|                      | S <sub>0</sub> →S <sub>5</sub>  | 3.04/408                    | 0.585 | H-4→L                    | 0.682           | MLCT/ILCT |
|                      |                                 |                             |       | H→L                      | 0.149           | MLCT/ILCT |
|                      | S <sub>0</sub> →S <sub>10</sub> | 3.63/341                    | 0.004 | H-1→L+1                  | 0.633           | ILCT      |
|                      |                                 |                             |       | H→L+1                    | 0.306           | LLCT      |
|                      | S <sub>0</sub> →S <sub>18</sub> | 4.06/305                    | 0.104 | H-1→L+2                  | 0.538           | MLCT      |
|                      |                                 |                             |       | H-2→L+2                  | 0.281           | MLCT      |
| H-3→L+1              |                                 |                             |       | 0.249                    | MLCT            |           |
| Triplet              | S <sub>0</sub> →T <sub>1</sub>  | 1.40/883                    | 0.000 | H→L                      | 0.619           | MLCT/ILCT |
|                      | S <sub>0</sub> →T <sub>2</sub>  | 2.05/606                    | 0.000 | H-4→L                    | 0.582           | MLCT/ILCT |
|                      | S <sub>0</sub> →T <sub>3</sub>  | 2.44/509                    | 0.000 | H-1→L                    | 0.640           | LLCT      |
|                      | S <sub>0</sub> →T <sub>4</sub>  | 2.56/484                    | 0.000 | H-2→L                    | 0.577           | LLCT      |
|                      | S <sub>0</sub> →T <sub>5</sub>  | 2.64/470                    | 0.000 | H-3→L                    | 0.597           | MLCT      |

<sup>a</sup> Only the selected low-lying excited states are presented. <sup>b</sup> Oscillator strengths. <sup>c</sup> Only the main configurations are presented. <sup>d</sup> The CI coefficients are in absolute values. <sup>e</sup> No spin-orbital coupling effect was considered, thus the  $f$  values are zero.

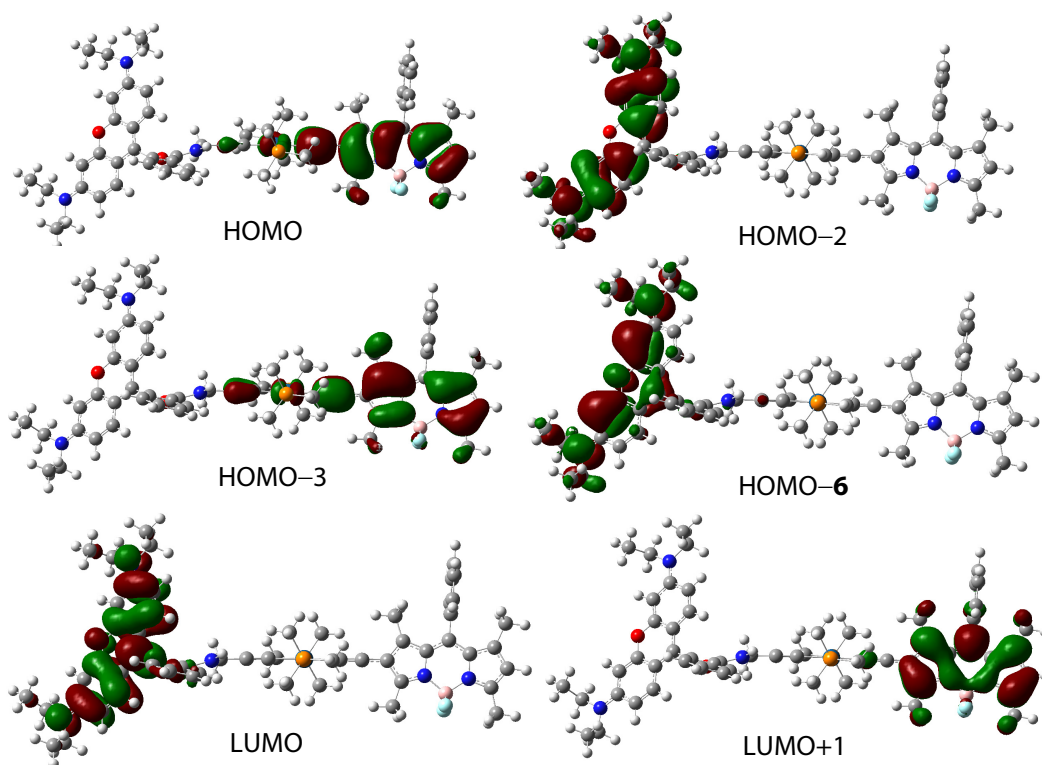

**Fig. S28** Electron density maps of the frontier molecular orbital of the complex **RH(o)-BDPY-Pt-1** in dichloromethane. Based on ground state optimized geometry by the DFT calculations at the B3LYP/GENECP level with Gaussian 09W.

**Table S4.** Electronic excitation energies (eV) and corresponding oscillator strengths ( $f$ ), main configurations and CI coefficients of the low-lying electronic excited states of the complex **RH(o)-BDPY-Pt-1** in dichloromethane calculated by TDDFT//B3LYP/GENECP based on the DFT//B3LYP/ GENECP optimized ground state geometries.

| TDDFT//B3LYP/ GENECP            |                                |                             |       |                          |                 |           |           |
|---------------------------------|--------------------------------|-----------------------------|-------|--------------------------|-----------------|-----------|-----------|
|                                 | Electronic transition          | Energy [eV/nm] <sup>a</sup> | $f^b$ | Composition <sup>c</sup> | CI <sup>d</sup> | Character |           |
| Singlet                         | S <sub>0</sub> →S <sub>1</sub> | 1.98/626                    | 0.001 | H→L                      | 0.7061          | LLCT      |           |
|                                 | S <sub>0</sub> →S <sub>2</sub> | 2.30/530                    | 0.453 | H→L+1                    | 0.6837          | ILCT      |           |
|                                 |                                |                             |       | H-3→L+1                  | 0.1731          | MLCT/ILCT |           |
|                                 | S <sub>0</sub> →S <sub>4</sub> | 2.60/476                    | 0.994 | H-2→L                    | 0.7043          | ILCT      |           |
|                                 | S <sub>0</sub> →S <sub>8</sub> | 3.06/404                    | 0.601 | H-3→L+1                  | 0.6758          | MLCT/ILCT |           |
| H→L+1                           |                                |                             |       | 0.1803                   | ILCT            |           |           |
| S <sub>0</sub> →S <sub>18</sub> | 3.63/342                       | 0.169                       | H-6→L | 0.1321                   | ILCT            |           |           |
| Triplet                         | S <sub>0</sub> →T <sub>1</sub> | 1.43/870                    | 0.00  | H→L+1                    | 0.6631          | ILCT      |           |
|                                 |                                |                             |       | 0                        | H-3→L+1         | 0.2563    | MLCT/ILCT |
|                                 | S <sub>0</sub> →T <sub>2</sub> | 1.74/714                    | 0.00  | H-2→L                    | 0.7033          | ILCT      |           |
|                                 | S <sub>0</sub> →T <sub>3</sub> | 1.98/626                    | 0.00  | 0                        | H→L             | 0.7060    | LLCT      |
|                                 |                                |                             |       |                          | 0               | H-3→L+1   | 0.6321    |
|                                 | S <sub>0</sub> →T <sub>4</sub> | 2.09/594                    | 0.00  | 0                        | H-2→L           | 0.7037    | ILCT      |
|                                 | S <sub>0</sub> →T <sub>5</sub> | 2.39/518                    | 0.00  | 0                        |                 |           |           |

<sup>a</sup> Only the selected low-lying excited states are presented. <sup>b</sup> Oscillator strengths. <sup>c</sup> Only the main configurations are presented. <sup>d</sup> The CI coefficients are in absolute values. <sup>e</sup> No spin-orbital coupling effect was considered, thus the  $f$  values are zero.

**Table S5.** Electronic excitation energies (eV) and corresponding oscillator strengths ( $f$ ), main configurations and CI coefficients of the low-lying electronic excited states of the complex **RHO-Pt** in dichloromethane calculated by TDDFT//B3LYP/GENECP based on the DFT//B3LYP/GENECP optimized ground state geometries.

| TDDFT//B3LYP/ GENECP |                                 |                             |        |                          |                 |           |
|----------------------|---------------------------------|-----------------------------|--------|--------------------------|-----------------|-----------|
|                      | Electronic transition           | Energy [eV/nm] <sup>a</sup> | $f^b$  | Composition <sup>c</sup> | CI <sup>d</sup> | Character |
| Singlet              | S <sub>0</sub> →S <sub>1</sub>  | 2.60/476                    | 0.9513 | H→L                      | 0.6972          | ILCT      |
|                      | S <sub>0</sub> →S <sub>4</sub>  | 3.10/399                    | 0.0231 | H-3→L                    | 0.6733          | ILCT      |
|                      | S <sub>0</sub> →S <sub>8</sub>  | 3.62/342                    | 0.1707 | H-7→L                    | 0.4561          | MLCT      |
|                      | S <sub>0</sub> →S <sub>11</sub> | 3.90/318                    | 0.0366 | H→L+1                    | 0.6339          | LLCT      |
| Triplet              | S <sub>0</sub> →T <sub>1</sub>  | 1.74/714                    | 0.000  | H→L                      | 0.7045          | ILCT      |
|                      |                                 |                             | 0      |                          |                 |           |
|                      | S <sub>0</sub> →T <sub>2</sub>  | 2.47/503                    | 0.000  | H-3→L                    | 0.6824          | ILCT      |
|                      |                                 |                             | 0      |                          |                 |           |
|                      | S <sub>0</sub> →T <sub>3</sub>  | 2.66/467                    | 0.000  | H-1→L                    | 0.6914          | MLCT      |
|                      |                                 | 0                           |        |                          |                 |           |
|                      | S <sub>0</sub> →T <sub>4</sub>  | 2.76/449                    | 0.000  | H-1→L                    | 0.1182          | MLCT      |
|                      |                                 |                             | 0      |                          |                 |           |

<sup>a</sup> Only the selected low-lying excited states are presented. <sup>b</sup> Oscillator strengths. <sup>c</sup> Only the main configurations are presented. <sup>d</sup> The CI coefficients are in absolute values. <sup>e</sup> No spin-orbital coupling effect was considered, thus the  $f$  values are zero.

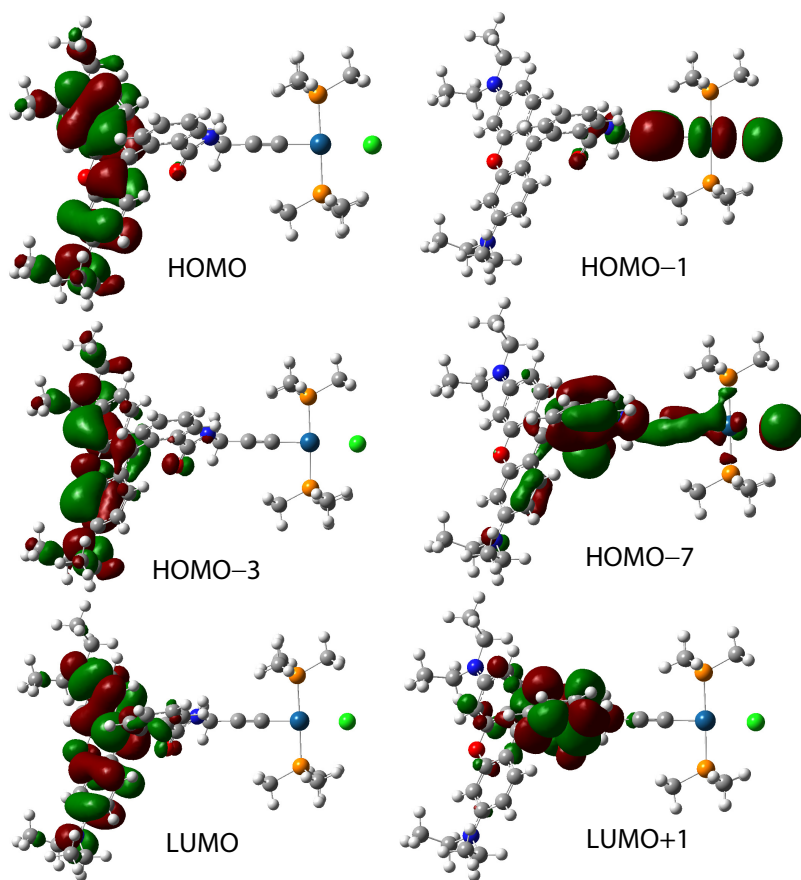

**Fig. S29** Electron density maps of the frontier molecular orbital of the complex **RH(o)-Pt** in dichloromethane Based on ground state optimized geometry by the DFT calculations at the B3LYP/GENECP level with Gaussian 09W.



## 6.0 The x -y- z coordinates of the optimized geometries of complexes

### BDPY-Pt-1 ground state configuration (B3LYP/6-31G/LANL2DZ)

Symbolic Z-matrix:

Charge = 0 Multiplicity = 1

|   |          |          |           |
|---|----------|----------|-----------|
| C | 2.75414  | 9.89495  | -11.42985 |
| P | 0.6833   | 10.54654 | -9.07646  |
| C | -0.0519  | 12.19226 | -8.75219  |
| H | -0.12324 | 12.3637  | -7.66857  |
| H | -1.04555 | 12.22832 | -9.19294  |
| H | 0.56765  | 12.96851 | -9.1959   |
| C | -0.33914 | 9.36561  | -8.11622  |
| H | 0.09851  | 8.37027  | -8.16805  |
| H | -1.33985 | 9.34057  | -8.5394   |
| H | -0.38963 | 9.68161  | -7.06425  |
| C | 2.30514  | 10.57203 | -8.21397  |
| H | 2.7684   | 9.5913   | -8.2715   |
| H | 2.96267  | 11.29724 | -8.68593  |
| H | 2.1551   | 10.84456 | -7.15856  |
| P | 0.77976  | 9.50729  | -13.70209 |
| C | 1.49523  | 7.84956  | -14.02661 |
| H | 1.56289  | 7.67708  | -15.11024 |
| H | 0.86678  | 7.08143  | -13.58163 |
| H | 2.48979  | 7.79964  | -13.58807 |
| C | -0.83586 | 9.50656  | -14.56902 |
| H | -1.28546 | 10.49304 | -14.50722 |
| H | -1.50434 | 8.78746  | -14.10366 |
| H | -0.68475 | 9.23816  | -15.62551 |
| C | 1.82681  | 10.67343 | -14.65332 |
| H | 1.40391  | 11.67467 | -14.60119 |
| H | 2.82641  | 10.68305 | -14.2252  |
| H | 1.87864  | 10.35888 | -15.70551 |
| C | 3.97783  | 9.81435  | -11.44898 |
| C | 6.47534  | 8.62071  | -11.32437 |
| C | 6.36076  | 10.85273 | -11.74196 |
| C | 5.57575  | 9.70911  | -11.47396 |
| C | 7.72118  | 10.42777 | -11.75581 |
| C | 8.92189  | 11.12188 | -11.98693 |
| C | 10.16072 | 10.45817 | -11.95783 |
| C | 11.51057 | 10.93135 | -12.14378 |
| C | 11.50974 | 8.66708  | -11.78139 |
| N | 7.73264  | 9.05479  | -11.42622 |
| N | 10.22369 | 9.07113  | -11.71195 |
| B | 9.00314  | 8.15373  | -11.43693 |
| F | 9.09003  | 7.6044   | -10.14856 |

|    |          |          |           |
|----|----------|----------|-----------|
| F  | 8.96414  | 7.11441  | -12.38901 |
| C  | 5.77922  | 12.23493 | -11.96737 |
| H  | 6.12727  | 12.93793 | -11.21099 |
| H  | 6.0611   | 12.63398 | -12.94014 |
| H  | 4.69432  | 12.16509 | -11.91331 |
| C  | 11.92321 | 7.24347  | -11.6109  |
| H  | 13.00051 | 7.17069  | -11.72566 |
| H  | 11.6235  | 6.87576  | -10.63008 |
| H  | 11.42765 | 6.61771  | -12.35683 |
| C  | 12.00375 | 12.3204  | -12.43055 |
| H  | 11.71912 | 13.01613 | -11.64288 |
| H  | 13.08887 | 12.28581 | -12.49968 |
| H  | 11.60043 | 12.70309 | -13.36762 |
| C  | 6.1238   | 7.16668  | -11.17973 |
| H  | 6.55825  | 6.76893  | -10.26287 |
| H  | 5.04058  | 7.06117  | -11.15245 |
| H  | 6.53004  | 6.59247  | -12.01206 |
| C  | 8.88124  | 12.59161 | -12.26447 |
| C  | 8.7973   | 13.05195 | -13.58363 |
| C  | 8.92682  | 13.51227 | -11.21093 |
| C  | 8.75369  | 14.42488 | -13.84782 |
| C  | 8.89466  | 14.88556 | -11.47652 |
| H  | 9.00171  | 13.15848 | -10.18952 |
| H  | 8.68297  | 14.77324 | -14.87151 |
| H  | 8.93634  | 15.59247 | -10.6563  |
| C  | 8.80519  | 15.34421 | -12.79488 |
| H  | 8.77592  | 16.40823 | -12.99969 |
| H  | 8.75186  | 12.3405  | -14.39972 |
| Cl | -1.53797 | 10.17764 | -11.36275 |
| Pt | 0.73682  | 10.02781 | -11.39831 |
| C  | 12.30916 | 9.8027   | -12.00112 |
| H  | 13.37791 | 9.80736  | -12.05265 |

**BDPY-Pt-2 ground state configuration (B3LYP/6-31G/LANL2DZ)**

Symbolic Z-matrix:

Charge = 0 Multiplicity = 1

|    |           |         |          |
|----|-----------|---------|----------|
| C  | -10.13944 | 2.2579  | -2.16761 |
| Pt | -8.1705   | 2.20045 | -1.72852 |
| P  | -7.85734  | 1.17746 | -3.82795 |
| C  | -8.43274  | 2.23467 | -5.21897 |
| H  | -8.33461  | 1.71101 | -6.17597 |
| H  | -7.83944  | 3.15349 | -5.24769 |
| H  | -9.47907  | 2.49952 | -5.0468  |
| C  | -6.13793  | 0.71952 | -4.28869 |
| H  | -5.73877  | 0.01402 | -3.5555  |
| H  | -5.50766  | 1.6124  | -4.27614 |

|   |           |          |          |
|---|-----------|----------|----------|
| H | -6.11377  | 0.26632  | -5.28534 |
| C | -8.81069  | -0.38412 | -4.01829 |
| H | -8.45545  | -1.11958 | -3.29031 |
| H | -9.86525  | -0.17641 | -3.81983 |
| H | -8.69658  | -0.79212 | -5.02837 |
| P | -8.50386  | 3.22556  | 0.36718  |
| C | -10.22965 | 3.66808  | 0.81746  |
| H | -10.26093 | 4.13495  | 1.80758  |
| H | -10.84808 | 2.76697  | 0.81628  |
| H | -10.63653 | 4.35645  | 0.07252  |
| C | -7.92536  | 2.17969  | 1.76589  |
| H | -6.87324  | 1.92966  | 1.60663  |
| H | -8.50469  | 1.25189  | 1.79043  |
| H | -8.04087  | 2.70336  | 2.72095  |
| C | -7.56762  | 4.79779  | 0.55902  |
| H | -6.50909  | 4.6035   | 0.36778  |
| H | -7.92666  | 5.52799  | -0.17239 |
| H | -7.69191  | 5.20683  | 1.5675   |
| C | -11.33569 | 2.27842  | -2.44748 |
| C | -19.4603  | 0.68528  | -4.45634 |
| C | -17.30848 | 0.3463   | -3.72964 |
| C | -17.48214 | 1.70445  | -4.12917 |
| C | -16.57626 | 2.80179  | -4.14053 |
| C | -17.02243 | 4.07318  | -4.59789 |
| C | -16.34047 | 5.31997  | -4.72264 |
| C | -18.52017 | 5.54122  | -5.41047 |
| N | -18.8091  | 1.86774  | -4.56561 |
| N | -18.34872 | 4.2528   | -5.02943 |
| B | -19.45136 | 3.17392  | -5.07945 |
| F | -19.91138 | 3.00747  | -6.39608 |
| F | -20.53282 | 3.54065  | -4.26205 |
| C | -16.08976 | -0.34026 | -3.18753 |
| H | -15.25672 | -0.34269 | -3.90049 |
| H | -15.7155  | 0.13046  | -2.27142 |
| H | -16.33826 | -1.38094 | -2.95456 |
| C | -19.81042 | 6.08054  | -5.9192  |
| H | -19.70593 | 7.14276  | -6.15304 |
| H | -20.13077 | 5.53887  | -6.81714 |
| H | -20.60575 | 5.94729  | -5.17624 |
| C | -14.91571 | 5.66497  | -4.40362 |
| H | -14.20034 | 5.07223  | -4.98543 |
| H | -14.74312 | 6.72191  | -4.63187 |
| H | -14.67036 | 5.50267  | -3.34772 |
| C | -20.88915 | 0.49949  | -4.82831 |
| H | -21.05726 | 0.78306  | -5.87374 |
| H | -21.18171 | -0.543   | -4.68168 |
| H | -21.53497 | 1.14741  | -4.22327 |

|    |           |          |          |
|----|-----------|----------|----------|
| C  | -15.17005 | 2.62307  | -3.66582 |
| C  | -14.83236 | 2.85234  | -2.32255 |
| C  | -14.15483 | 2.22299  | -4.54898 |
| C  | -13.51984 | 2.68729  | -1.8737  |
| C  | -12.84102 | 2.05688  | -4.10396 |
| H  | -14.40184 | 2.0425   | -5.59195 |
| H  | -13.27901 | 2.8695   | -0.82949 |
| H  | -12.06893 | 1.74699  | -4.80359 |
| C  | -12.51996 | 2.28873  | -2.76429 |
| H  | -15.60882 | 3.16206  | -1.6279  |
| Cl | -5.94515  | 2.13276  | -1.23695 |
| C  | -18.54917 | -0.29282 | -3.93665 |
| H  | -18.7591  | -1.32294 | -3.73749 |
| C  | -17.28045 | 6.23986  | -5.23265 |
| H  | -17.08946 | 7.27117  | -5.44433 |

**RH-BDPY-Pt-1 ground state configuration (B3LYP/6-31G/LANL2DZ)**

Symbolic Z-matrix:

Charge = 0 Multiplicity = 1

|   |             |             |             |
|---|-------------|-------------|-------------|
| C | -4.59129877 | -1.09896594 | 0.08096644  |
| P | -3.75887040 | 1.29653031  | -1.74198957 |
| C | -2.87485012 | 2.82592595  | -1.22966388 |
| H | -3.25958754 | 3.69718511  | -1.77081164 |
| H | -1.80922466 | 2.70077985  | -1.43787873 |
| H | -3.00691840 | 2.98089909  | -0.15463638 |
| C | -3.63276026 | 1.28290779  | -3.57711639 |
| H | -4.23439230 | 0.46071638  | -3.97602736 |
| H | -2.58867786 | 1.12023765  | -3.85594529 |
| H | -3.98803034 | 2.22926757  | -3.99918141 |
| C | -5.53007748 | 1.66491315  | -1.41601627 |
| H | -6.14709357 | 0.83901767  | -1.77897417 |
| H | -5.69265483 | 1.75910689  | -0.33937193 |
| H | -5.82693514 | 2.59270133  | -1.91641147 |
| P | -2.00636424 | -2.60407771 | 0.25368426  |
| C | -2.86979804 | -4.13419839 | -0.29111426 |
| H | -2.49485024 | -5.00911041 | 0.25068111  |
| H | -2.71237347 | -4.27948998 | -1.36403343 |
| H | -3.94085843 | -4.01751403 | -0.10731597 |
| C | -0.22441811 | -2.96603718 | -0.01512323 |
| H | 0.37834095  | -2.13633462 | 0.36225880  |
| H | -0.02775698 | -3.06487141 | -1.08527378 |
| H | 0.05650742  | -3.89089406 | 0.50013852  |
| C | -2.19773638 | -2.60307157 | 2.08348496  |
| H | -1.61661598 | -1.77920299 | 2.50867130  |

|   |              |             |             |
|---|--------------|-------------|-------------|
| H | -3.25226265  | -2.44711084 | 2.32504644  |
| H | -1.85359665  | -3.54891280 | 2.51535649  |
| C | -5.66692907  | -1.37810155 | 0.60094671  |
| C | -7.90008059  | -2.55504738 | 0.58892497  |
| C | -7.43984518  | -1.26390956 | 2.41169529  |
| C | -6.92150606  | -1.70293978 | 1.18149040  |
| C | -8.73115649  | -1.86426683 | 2.54464399  |
| C | -9.70131718  | -1.78856141 | 3.55707566  |
| C | -10.91830480 | -2.48672303 | 3.45186534  |
| C | -12.04797360 | -2.57766734 | 4.33077458  |
| C | -12.40765893 | -3.83625165 | 2.47153324  |
| N | -8.96499869  | -2.64439994 | 1.40158151  |
| N | -11.18773212 | -3.27602961 | 2.32625916  |
| B | -10.24604052 | -3.47794842 | 1.11014426  |
| F | -10.86045291 | -3.01696812 | -0.05826445 |
| F | -9.91532102  | -4.82920225 | 0.97300287  |
| C | -6.71243106  | -0.34284393 | 3.34326885  |
| H | -7.27814654  | 0.57332629  | 3.54400046  |
| H | -6.51475227  | -0.80909086 | 4.31497685  |
| H | -5.75345501  | -0.06445650 | 2.89605368  |
| C | -13.00958782 | -4.74328366 | 1.44752949  |
| H | -13.99970940 | -5.07687604 | 1.76798662  |
| H | -13.09906021 | -4.23285085 | 0.48244603  |
| H | -12.37276745 | -5.61936484 | 1.28386727  |
| C | -12.27744580 | -1.93107560 | 5.66573025  |
| H | -12.26113336 | -0.83771185 | 5.60300598  |
| H | -13.25367588 | -2.23284822 | 6.05787149  |
| H | -11.51520754 | -2.21466089 | 6.39932100  |
| C | -7.81021811  | -3.25995581 | -0.72286832 |
| H | -8.64747885  | -2.97756663 | -1.36983918 |
| H | -6.86819155  | -3.00934082 | -1.21582745 |
| H | -7.87054430  | -4.34507310 | -0.58371820 |
| C | -9.43755137  | -0.95314786 | 4.76903931  |
| C | -8.79696025  | -1.50751254 | 5.88575613  |
| C | -9.83056186  | 0.39205878  | 4.80257760  |
| C | -8.55336026  | -0.72783312 | 7.01838581  |
| C | -9.58554969  | 1.17042542  | 5.93588801  |
| H | -10.32742047 | 0.82637511  | 3.93939884  |
| H | -8.05646824  | -1.16834839 | 7.87839184  |
| H | -9.89406251  | 2.21214350  | 5.95026782  |
| C | -8.94687308  | 0.61230251  | 7.04585408  |
| H | -8.75677828  | 1.21828762  | 7.92732336  |
| H | -8.49139364  | -2.54997285 | 5.86470946  |
| C | -12.95827971 | -3.42102574 | 3.69901634  |
| H | -13.92864127 | -3.71530363 | 4.07824311  |
| C | 2.32886003   | -2.06493749 | 4.12440450  |
| C | 2.56411939   | -2.44810557 | 2.79536194  |

|   |             |             |             |
|---|-------------|-------------|-------------|
| C | 2.43082616  | -3.81019992 | 2.51678481  |
| C | 2.08371269  | -4.74532625 | 3.49261173  |
| C | 1.83253416  | -4.35018990 | 4.82034045  |
| C | 1.98117848  | -2.96748734 | 5.11453342  |
| H | 2.42566074  | -1.01530586 | 4.38928644  |
| H | 2.01577773  | -5.77675612 | 3.17405410  |
| H | 1.82595074  | -2.59472749 | 6.11865036  |
| C | 2.92150413  | -1.42907714 | 1.72258871  |
| C | 3.58527035  | -1.42719502 | -0.74401708 |
| C | 3.79451793  | -2.03747604 | -1.96895401 |
| C | 3.59553461  | -3.43607985 | -2.12927251 |
| C | 3.21395666  | -4.15595170 | -0.98112695 |
| C | 3.00870621  | -3.51062350 | 0.23879763  |
| C | 3.17934816  | -2.13365856 | 0.39838259  |
| H | 3.74349874  | -0.35469665 | -0.66448245 |
| H | 4.11380562  | -1.42366106 | -2.80119384 |
| H | 3.06075066  | -5.22659683 | -0.99512066 |
| O | 2.63717682  | -4.34127983 | 1.26731590  |
| C | 3.68347079  | 0.79642034  | 2.23023179  |
| C | 4.09120145  | -0.53287773 | 2.14168962  |
| C | 4.56136114  | 1.81376010  | 2.59587754  |
| C | 5.40841367  | -0.88456922 | 2.41935599  |
| C | 6.29888724  | 0.12834161  | 2.78790233  |
| C | 5.88291170  | 1.46519795  | 2.87646090  |
| H | 4.21242751  | 2.84052709  | 2.65606917  |
| H | 5.73804131  | -1.91766506 | 2.35264334  |
| H | 7.33233907  | -0.12457986 | 3.00993997  |
| H | 6.59728799  | 2.23124233  | 3.16525591  |
| N | 1.84385975  | -0.39880042 | 1.58634193  |
| C | 0.46510581  | -0.70113919 | 1.26135416  |
| H | 0.30015176  | -1.77565765 | 1.37424316  |
| H | -0.18628398 | -0.17846520 | 1.97089965  |
| C | 0.10421754  | -0.25577160 | -0.16957253 |
| C | 3.53598304  | -5.49355470 | -3.50667442 |
| H | 2.64208513  | -5.77644923 | -2.93873398 |
| C | 4.21798402  | -3.30788879 | -4.52467535 |
| H | 3.67528957  | -2.35659489 | -4.58108126 |
| C | 1.32793366  | -6.68496552 | 5.47315132  |
| H | 0.81701701  | -6.79583436 | 4.50909972  |
| C | 1.21612559  | -4.84452430 | 7.17031889  |
| H | 0.64834714  | -3.90656151 | 7.17236923  |
| C | 2.24134694  | 0.88580824  | 1.88154852  |
| O | 1.51911319  | 1.87739712  | 1.84897683  |
| N | 1.44128284  | -5.26289382 | 5.78856832  |
| N | 3.75354935  | -4.05662269 | -3.35876044 |
| H | 3.29309324  | -5.67906918 | -4.55839765 |
| H | 3.91794828  | -3.87425500 | -5.41228496 |

|    |             |             |             |
|----|-------------|-------------|-------------|
| C  | 4.72258621  | -6.37730807 | -3.09437562 |
| H  | 5.59785645  | -6.18049377 | -3.72238392 |
| H  | 5.00889487  | -6.19960935 | -2.05301661 |
| H  | 4.46031280  | -7.43680503 | -3.20056432 |
| C  | 5.73152606  | -3.05144370 | -4.57175146 |
| H  | 6.06998144  | -2.50747190 | -3.68443124 |
| H  | 6.29003329  | -3.99189471 | -4.62283083 |
| H  | 5.98718951  | -2.45556593 | -5.45617482 |
| C  | 2.48595788  | -4.68943214 | 8.02008323  |
| H  | 3.01542935  | -5.64298259 | 8.11743385  |
| H  | 3.17597896  | -3.96560590 | 7.57511859  |
| H  | 2.22740646  | -4.34059719 | 9.02717435  |
| H  | 0.66061654  | -7.13037166 | 6.21849253  |
| H  | 0.56006502  | -5.59059544 | 7.63110439  |
| C  | 2.65635946  | -7.45558517 | 5.45388223  |
| H  | 3.35930803  | -7.01924002 | 4.73753531  |
| H  | 3.13189270  | -7.44681194 | 6.44016310  |
| H  | 2.48351012  | -8.50048965 | 5.16945239  |
| C  | -1.39435679 | -0.45551541 | -0.46279151 |
| Pt | -2.86943842 | -0.65212790 | -0.75141379 |

**RH-BDPY-Pt-2 ground state configuration (B3LYP/6-31G/LANL2DZ)**

Symbolic Z-matrix:

Charge = 0 Multiplicity = 1

|   |             |            |             |
|---|-------------|------------|-------------|
| C | 0.43658174  | 7.29920261 | -7.23112397 |
| C | -0.82922322 | 5.92253038 | -5.93762948 |
| C | 0.44873226  | 5.32056200 | -6.18850409 |
| C | 1.00424946  | 4.09632930 | -5.77833553 |
| C | 2.30877152  | 3.73409109 | -6.15514953 |
| C | 3.09079877  | 2.56179476 | -5.88621240 |
| C | 4.28374937  | 4.01362466 | -7.16673546 |
| N | 1.18938035  | 6.20497120 | -6.98619151 |
| N | 3.08449357  | 4.59427985 | -6.94599717 |
| B | 2.63839428  | 5.97656040 | -7.48880196 |
| F | 2.67018086  | 5.97845592 | -8.88997615 |
| F | 3.48287247  | 6.98293618 | -7.00140350 |
| C | -1.99087163 | 5.40388388 | -5.14170477 |
| H | -2.39685782 | 4.47754957 | -5.56234768 |
| H | -1.71475051 | 5.18365424 | -4.10518279 |
| H | -2.79137262 | 6.14993610 | -5.12996341 |
| C | 5.36326259  | 4.65823741 | -7.97489746 |
| H | 6.23755392  | 4.00550699 | -8.03175892 |
| H | 5.01225000  | 4.87403924 | -8.98971665 |
| H | 5.66183692  | 5.61470055 | -7.53190049 |
| C | 2.73536556  | 1.33611181 | -5.09663622 |

|   |             |             |             |
|---|-------------|-------------|-------------|
| H | 1.83858335  | 0.84188596  | -5.48483189 |
| H | 3.56230144  | 0.62043112  | -5.13553625 |
| H | 2.53647057  | 1.56722829  | -4.04450075 |
| C | 0.91907509  | 8.45098518  | -8.05248678 |
| H | 1.18884980  | 8.12251560  | -9.06200191 |
| H | 0.14502654  | 9.21878423  | -8.12309503 |
| H | 1.81933869  | 8.89205944  | -7.61095368 |
| C | 0.19903269  | 3.17182069  | -4.92465133 |
| C | 0.29369427  | 3.23003743  | -3.52659888 |
| C | -0.66746206 | 2.23319129  | -5.50321212 |
| C | -0.46058709 | 2.37589517  | -2.72698078 |
| C | -1.42165295 | 1.37587585  | -4.70622231 |
| H | -0.75148886 | 2.17523927  | -6.58507341 |
| H | -0.37725865 | 2.43582601  | -1.64609775 |
| H | -2.08769651 | 0.65483706  | -5.17041119 |
| H | 0.96119095  | 3.95148845  | -3.06319329 |
| C | 4.31194629  | 2.76069707  | -6.52411518 |
| H | 5.14931419  | 2.07472251  | -6.53381067 |
| C | -2.11588727 | 0.55708231  | -2.47607779 |
| C | -1.33849529 | 1.42771855  | -3.29728296 |
| C | -0.81158221 | 7.14871319  | -6.59644759 |
| H | -1.61474062 | 7.87403126  | -6.62273809 |
| P | -2.30349875 | -1.27918621 | 1.17648970  |
| C | -3.04415219 | -0.96716015 | 2.83072613  |
| H | -2.25919177 | -0.92586394 | 3.59338392  |
| H | -3.75082043 | -1.76446651 | 3.07473308  |
| H | -3.57788667 | -0.01200010 | 2.81426114  |
| C | -1.38535819 | -2.86091818 | 1.38032391  |
| H | -0.80435783 | -3.06439962 | 0.47589166  |
| H | -2.10417139 | -3.67176484 | 1.52444398  |
| H | -0.70959743 | -2.81214588 | 2.24069834  |
| C | -0.98458517 | -0.00591777 | 1.03912014  |
| H | -0.42847810 | -0.14896934 | 0.11012592  |
| H | -1.43773678 | 0.98886264  | 1.01756266  |
| H | -0.30407002 | -0.07715802 | 1.89436998  |
| P | -5.52396216 | -1.75395326 | -2.25469817 |
| C | -5.33475867 | -0.86403968 | -3.85172922 |
| H | -6.16750520 | -1.11109396 | -4.51874160 |
| H | -4.39090778 | -1.14924907 | -4.32262075 |
| H | -5.31605055 | 0.21371242  | -3.67235304 |
| C | -5.65840100 | -3.52394459 | -2.73792901 |
| H | -5.81794704 | -4.12473997 | -1.83906478 |
| H | -4.72440653 | -3.84348569 | -3.20957481 |
| H | -6.48679060 | -3.67531795 | -3.43811883 |
| C | -7.21599332 | -1.30461265 | -1.69029325 |
| H | -7.43677594 | -1.84963701 | -0.76918451 |
| H | -7.25799686 | -0.23123922 | -1.48236516 |



|   |              |             |             |
|---|--------------|-------------|-------------|
| H | -7.95834499  | -1.55314256 | -2.45587152 |
| C | -7.89106348  | -7.20109008 | 3.64668461  |
| C | -7.08599184  | -7.21844696 | 2.49604473  |
| C | -7.67588799  | -7.74535832 | 1.34396872  |
| C | -8.98470526  | -8.23061636 | 1.32332219  |
| C | -9.79281919  | -8.19446907 | 2.47881658  |
| C | -9.19368982  | -7.67048068 | 3.65927687  |
| H | -7.47514555  | -6.80442395 | 4.56916798  |
| H | -9.34311429  | -8.62898704 | 0.38351372  |
| H | -9.74449388  | -7.63290943 | 4.59006615  |
| C | -5.66545922  | -6.67276208 | 2.50723580  |
| C | -3.66662793  | -6.55833147 | 0.91808747  |
| C | -3.05151656  | -6.72623306 | -0.31143424 |
| C | -3.77124895  | -7.25217008 | -1.42170576 |
| C | -5.11457751  | -7.61386590 | -1.18844645 |
| C | -5.70303695  | -7.43079013 | 0.06472191  |
| C | -5.00956945  | -6.89368627 | 1.15151774  |
| H | -3.08060251  | -6.15234525 | 1.73837489  |
| H | -2.00886398  | -6.45263720 | -0.40651310 |
| H | -5.73430524  | -8.05072471 | -1.96011346 |
| O | -7.01529495  | -7.83503193 | 0.14161519  |
| C | -4.42253969  | -6.23807461 | 4.51811194  |
| C | -4.82791960  | -7.25106539 | 3.65098089  |
| C | -3.64448564  | -6.50011301 | 5.64414324  |
| C | -4.45914578  | -8.57207372 | 3.88895994  |
| C | -3.67788966  | -8.84719589 | 5.01667774  |
| C | -3.27283534  | -7.82371040 | 5.88769962  |
| H | -3.34230748  | -5.69322317 | 6.30545680  |
| H | -4.76811936  | -9.37099270 | 3.22069320  |
| H | -3.37973109  | -9.87160287 | 5.22220447  |
| H | -2.66675821  | -8.06653790 | 6.75579255  |
| N | -5.65806010  | -5.22378870 | 2.88745662  |
| C | -6.39787998  | -4.19622949 | 2.15743997  |
| H | -7.19695083  | -4.70523510 | 1.60652724  |
| H | -6.88577117  | -3.55826315 | 2.90520118  |
| C | -5.58310092  | -3.36585859 | 1.25989556  |
| C | -3.92942680  | -7.97835572 | -3.78373933 |
| H | -4.94130192  | -7.55658523 | -3.80065595 |
| C | -1.77849257  | -7.05260760 | -2.88348338 |
| H | -1.55669149  | -6.10425561 | -2.38095137 |
| C | -11.68831828 | -9.21303228 | 1.25205878  |
| H | -11.40558271 | -8.60154780 | 0.38688234  |
| C | -11.92653341 | -8.60167374 | 3.67337699  |
| H | -11.76225562 | -7.65225971 | 4.19562430  |
| C | -4.96052490  | -4.94058413 | 4.03044377  |
| O | -4.82950176  | -3.82553727 | 4.53987474  |
| N | -11.10650755 | -8.62759952 | 2.46086290  |

|    |              |              |             |
|----|--------------|--------------|-------------|
| N  | -3.18733510  | -7.38868050  | -2.66862398 |
| H  | -3.44740376  | -7.64141533  | -4.70650546 |
| H  | -1.65311499  | -6.86169367  | -3.95370973 |
| C  | -4.00151052  | -9.51255271  | -3.77901404 |
| H  | -3.00294996  | -9.95390147  | -3.86142720 |
| H  | -4.46423450  | -9.88959655  | -2.86126230 |
| H  | -4.59916647  | -9.86138501  | -4.62937755 |
| C  | -0.77878982  | -8.12946208  | -2.43740317 |
| H  | -0.89300330  | -8.36400529  | -1.37405603 |
| H  | -0.91649266  | -9.05529357  | -3.00557400 |
| H  | 0.24737339   | -7.77949514  | -2.60056406 |
| C  | -11.70026476 | -9.77611223  | 4.63630698  |
| H  | -11.95631287 | -10.72959150 | 4.16276825  |
| H  | -10.65653187 | -9.82938590  | 4.96267916  |
| H  | -12.32989525 | -9.65799060  | 5.52606103  |
| H  | -12.77520421 | -9.12351423  | 1.34128199  |
| H  | -12.97312435 | -8.59095120  | 3.35378811  |
| C  | -11.31838222 | -10.68185551 | 0.99882519  |
| H  | -10.23453958 | -10.81460319 | 0.92017238  |
| H  | -11.68106302 | -11.32411976 | 1.80796975  |
| H  | -11.77184733 | -11.02569885 | 0.06171029  |
| C  | -4.92221534  | -2.62720563  | 0.54423685  |
| Pt | -3.87385435  | -1.41344664  | -0.59282312 |
| C  | -2.78593080  | -0.18494852  | -1.76180253 |

**RHO-BDPY-Pt-1(open amide form) ground state configuration (B3LYP/6-31G/LANL2DZ)**

Symbolic Z-matrix:

Charge = 1 Multiplicity = 1

|   |             |             |             |
|---|-------------|-------------|-------------|
| C | -4.91909087 | -0.36277610 | -0.75472885 |
| P | -2.79819185 | -2.60746034 | -1.42191144 |
| C | -1.53920664 | -2.99025265 | -2.70676998 |
| H | -1.56208483 | -4.05840761 | -2.94801139 |
| H | -0.54673042 | -2.71513952 | -2.34160284 |
| H | -1.75618804 | -2.41454993 | -3.61177983 |
| C | -2.36043455 | -3.72068921 | -0.02240452 |
| H | -3.11757861 | -3.63682608 | 0.76258459  |
| H | -1.39387232 | -3.41710909 | 0.38850256  |
| H | -2.30191182 | -4.76145151 | -0.35845255 |
| C | -4.34293441 | -3.33716234 | -2.10253392 |
| H | -5.15452127 | -3.21485780 | -1.38209910 |
| H | -4.61907475 | -2.81209197 | -3.02144180 |
| H | -4.19564166 | -4.39955310 | -2.32317818 |
| P | -2.90841179 | 1.90032297  | -0.01868361 |
| C | -4.36464980 | 2.43808807  | 0.96765769  |

|   |              |             |             |
|---|--------------|-------------|-------------|
| H | -4.30623257  | 3.51057832  | 1.18057819  |
| H | -4.38762424  | 1.88473303  | 1.91126843  |
| H | -5.27957050  | 2.21498460  | 0.41495891  |
| C | -1.48106291  | 2.42219357  | 1.01674082  |
| H | -0.55153292  | 2.19077115  | 0.49247146  |
| H | -1.49172189  | 1.86508811  | 1.95823874  |
| H | -1.53654898  | 3.49477140  | 1.22974610  |
| C | -2.87880648  | 3.06914250  | -1.44216611 |
| H | -1.98004471  | 2.89281464  | -2.04011878 |
| H | -3.75648178  | 2.89962296  | -2.07248003 |
| H | -2.88158212  | 4.10661369  | -1.09071448 |
| C | -6.14859611  | -0.36747354 | -0.75766439 |
| C | -8.37775771  | -0.75896318 | 0.36277932  |
| C | -8.43891102  | -0.03643196 | -1.79836906 |
| C | -7.56858112  | -0.37967899 | -0.74889283 |
| C | -9.76774457  | -0.21526777 | -1.30107920 |
| C | -11.02479788 | -0.03073922 | -1.89794351 |
| C | -12.21178258 | -0.28413940 | -1.18482074 |
| C | -13.59164016 | -0.17766829 | -1.55749128 |
| C | -13.42421783 | -0.89004360 | 0.59514890  |
| N | -9.67569252  | -0.65883847 | 0.02833968  |
| N | -12.16022116 | -0.72518877 | 0.14437377  |
| B | -10.87218877 | -0.97969743 | 0.96549945  |
| F | -10.81486583 | -2.31814005 | 1.37590198  |
| F | -10.84022883 | -0.14409632 | 2.08981374  |
| C | -7.97788665  | 0.42025467  | -3.14880062 |
| H | -8.32347190  | -0.24249652 | -3.94955141 |
| H | -8.34219087  | 1.42438047  | -3.39193213 |
| H | -6.88410756  | 0.43822039  | -3.16657855 |
| C | -13.73747633 | -1.35146016 | 1.98178574  |
| H | -14.81852131 | -1.41330570 | 2.12755632  |
| H | -13.29521263 | -2.33499238 | 2.17361855  |
| H | -13.31674427 | -0.66416010 | 2.72376368  |
| C | -14.20141743 | 0.24727355  | -2.86132697 |
| H | -13.88592812 | -0.39291583 | -3.69183141 |
| H | -15.29235934 | 0.19891524  | -2.79052250 |
| H | -13.92403165 | 1.27187448  | -3.13093712 |
| C | -7.90876196  | -1.20391164 | 1.70727535  |
| H | -8.28725484  | -2.20528336 | 1.93887990  |
| H | -6.81689104  | -1.21518531 | 1.73278081  |
| H | -8.28149640  | -0.53395695 | 2.48983922  |
| C | -11.10647464 | 0.44402098  | -3.31353981 |
| C | -11.15876107 | 1.81570549  | -3.59762905 |
| C | -11.13265633 | -0.47674713 | -4.37032884 |
| C | -11.23607170 | 2.25927738  | -4.91964809 |
| C | -11.21007026 | -0.03102637 | -5.69165924 |
| H | -11.09215355 | -1.54103547 | -4.15586893 |

|    |              |             |             |
|----|--------------|-------------|-------------|
| H  | -11.27552471 | 3.32473525  | -5.12810415 |
| H  | -11.22942649 | -0.75354499 | -6.50271922 |
| C  | -11.26212334 | 1.33728220  | -5.96898272 |
| H  | -11.32237255 | 1.68305841  | -6.99703722 |
| H  | -11.13780268 | 2.53363149  | -2.78249647 |
| C  | -14.32351703 | -0.55963532 | -0.43478891 |
| H  | -15.40253934 | -0.59909120 | -0.35674020 |
| C  | 0.35061066   | -0.35676302 | -0.73706310 |
| C  | -0.87366168  | -0.33977232 | -0.72458057 |
| Pt | -2.89640887  | -0.35209875 | -0.73187545 |
| C  | 6.91919096   | 0.56636704  | -0.97307292 |
| C  | 6.93272455   | 0.50467936  | 0.44910005  |
| C  | 7.29034453   | 1.71014900  | 1.11663489  |
| C  | 7.59181731   | 2.88175915  | 0.45137390  |
| C  | 7.54342039   | 2.93601199  | -0.96458959 |
| C  | 7.21126782   | 1.71695183  | -1.65413355 |
| H  | 6.67772285   | -0.33227216 | -1.53028089 |
| H  | 7.86188765   | 3.73883067  | 1.05162813  |
| H  | 7.19871583   | 1.69243301  | -2.73507651 |
| C  | 6.45735123   | -1.65560870 | 3.50085931  |
| C  | 6.55641027   | -1.52235766 | 4.85873848  |
| C  | 6.92980096   | -0.27253179 | 5.46758875  |
| C  | 7.20942391   | 0.81089228  | 4.59646179  |
| C  | 7.09771231   | 0.65390578  | 3.22960972  |
| C  | 6.73012542   | -0.57588944 | 2.61380085  |
| H  | 6.16212486   | -2.61073027 | 3.08133362  |
| H  | 6.34669904   | -2.38475172 | 5.47644711  |
| H  | 7.50879438   | 1.78229101  | 4.96344630  |
| O  | 7.36557440   | 1.75499541  | 2.47474836  |
| C  | 7.42998835   | 1.12932973  | 7.43521923  |
| H  | 6.92562600   | 1.95730387  | 6.92599011  |
| C  | 6.69860922   | -1.26076611 | 7.72590693  |
| H  | 5.82213101   | -1.79563489 | 7.34859068  |
| C  | 8.18582318   | 5.31780697  | -0.93513811 |
| H  | 7.53907629   | 5.43864851  | -0.05982445 |
| C  | 7.73778764   | 4.14573902  | -3.11612507 |
| H  | 6.87431192   | 3.56806169  | -3.45905880 |
| N  | 7.79442440   | 4.08749310  | -1.64463491 |
| N  | 6.99697376   | -0.13726362 | 6.81975202  |
| C  | 6.62965644   | -0.64536650 | 1.20924022  |
| C  | 5.88639698   | -4.42386986 | -0.71332206 |
| C  | 4.85128043   | -3.49604893 | -0.60975714 |
| C  | 5.05288999   | -2.24951127 | -0.00131285 |
| C  | 6.32299280   | -1.94517326 | 0.53530952  |
| C  | 7.14540227   | -4.11353285 | -0.20185389 |
| H  | 5.70540151   | -5.38668695 | -1.18126546 |
| H  | 3.86372320   | -3.76627830 | -0.97255753 |

|   |             |             |             |
|---|-------------|-------------|-------------|
| H | 7.96034310  | -4.82706155 | -0.27796673 |
| C | 3.93835480  | -1.24942735 | 0.15323906  |
| O | 3.93476251  | -0.43237261 | 1.07426775  |
| N | 2.94381914  | -1.29226862 | -0.77730293 |
| H | 3.03664502  | -1.89865376 | -1.57859872 |
| C | 7.35743056  | -2.88347246 | 0.42201043  |
| H | 8.33766578  | -2.64367201 | 0.82412539  |
| H | 7.05069299  | 1.12997336  | 8.45997731  |
| H | 6.39329028  | -0.82298317 | 8.67986097  |
| C | 8.94819338  | 1.34399641  | 7.44447967  |
| H | 9.45438805  | 0.57322343  | 8.03327025  |
| H | 9.36614357  | 1.32618397  | 6.43321559  |
| H | 9.17945855  | 2.31681013  | 7.89167638  |
| C | 7.86911852  | -2.22518912 | 7.94830616  |
| H | 8.21117204  | -2.66895221 | 7.00785805  |
| H | 8.72033155  | -1.71708200 | 8.41131844  |
| H | 7.55736756  | -3.03648507 | 8.61495794  |
| C | 9.66347320  | 5.37349953  | -0.52913196 |
| H | 9.93675718  | 4.53910510  | 0.12415626  |
| H | 10.31663492 | 5.34372646  | -1.40628557 |
| H | 9.86235122  | 6.30664453  | 0.00889998  |
| C | 9.01640857  | 3.67976789  | -3.82185299 |
| H | 9.86993369  | 4.31122123  | -3.55744932 |
| H | 9.26790862  | 2.64618839  | -3.56315787 |
| H | 8.87960018  | 3.73594306  | -4.90721571 |
| H | 7.52649619  | 5.18480057  | -3.38191647 |
| H | 7.95383610  | 6.15427366  | -1.59894965 |
| C | 1.83017903  | -0.35199269 | -0.74143880 |
| H | 1.87602810  | 0.26391941  | 0.13231754  |
| H | 2.23024416  | 0.18371216  | -1.57682387 |

**RHO-BDPY-Pt-2(open amide form) ground state configuration (B3LYP/6-31G/LANL2DZ)**

Symbolic Z-matrix:

Charge = 1 Multiplicity = 1

|   |            |              |              |
|---|------------|--------------|--------------|
| C | 6.06861835 | -17.40365658 | -9.20399709  |
| C | 4.36480873 | -15.88937059 | -9.18599317  |
| C | 5.29000237 | -15.57734477 | -10.23085427 |
| C | 5.31430115 | -14.54802026 | -11.18499336 |
| C | 6.35846940 | -14.45272142 | -12.12431185 |
| C | 6.61218446 | -13.51631710 | -13.17930095 |
| C | 8.26235505 | -15.07919695 | -13.11837369 |
| N | 6.31620110 | -16.53575241 | -10.19996634 |
| N | 7.39848434 | -15.39203264 | -12.12644419 |

|   |             |              |              |
|---|-------------|--------------|--------------|
| B | 7.53770225  | -16.59224830 | -11.15786263 |
| F | 8.72743914  | -16.48897923 | -10.42505540 |
| F | 7.53247115  | -17.79680439 | -11.87364929 |
| C | 3.10156815  | -15.18885825 | -8.78815246  |
| H | 3.28099797  | -14.14996702 | -8.49086458  |
| H | 2.37018417  | -15.16127418 | -9.60326946  |
| H | 2.65181288  | -15.71520278 | -7.94099654  |
| C | 9.49146664  | -15.87931211 | -13.40629429 |
| H | 10.03937508 | -15.44672816 | -14.24677012 |
| H | 10.14889469 | -15.91093639 | -12.53078249 |
| H | 9.23213131  | -16.91623654 | -13.64600457 |
| C | 5.81582301  | -12.31905543 | -13.60914315 |
| H | 5.70429109  | -11.58706736 | -12.80237945 |
| H | 6.31618194  | -11.82616302 | -14.44831182 |
| H | 4.80438742  | -12.59081158 | -13.92943399 |
| C | 6.95712430  | -18.55785468 | -8.88152287  |
| H | 7.96987645  | -18.21421243 | -8.64512079  |
| H | 6.55358358  | -19.10791685 | -8.02855966  |
| H | 7.04255381  | -19.23366934 | -9.73951634  |
| C | 4.21341287  | -13.53630807 | -11.20654983 |
| C | 3.06714715  | -13.75475622 | -11.98328290 |
| C | 4.31643335  | -12.35942722 | -10.45180439 |
| C | 2.03929168  | -12.80948521 | -12.00433463 |
| C | 3.28741786  | -11.41539704 | -10.47434515 |
| H | 5.20254466  | -12.18511852 | -9.84784544  |
| H | 1.15523258  | -12.98952331 | -12.60950959 |
| H | 3.37786123  | -10.50707777 | -9.88527623  |
| H | 2.98171226  | -14.66554429 | -12.56934099 |
| C | 7.80007882  | -13.92758559 | -13.78077278 |
| H | 8.29324511  | -13.44938794 | -14.61746359 |
| C | 0.26403313  | -9.77938712  | -11.51967663 |
| P | -0.08719957 | -6.94992601  | -10.15852342 |
| C | 0.00083837  | -5.17000434  | -10.61301581 |
| H | 0.49744393  | -4.60381482  | -9.81772454  |
| H | -1.00819650 | -4.78067260  | -10.76894126 |
| H | 0.57095772  | -5.05902329  | -11.54048791 |
| C | -0.97220770 | -6.95512828  | -8.54413094  |
| H | -0.98903232 | -7.97115281  | -8.13926165  |
| H | -2.00193066 | -6.62186685  | -8.69858325  |
| H | -0.47795285 | -6.28911930  | -7.82881035  |
| C | 1.64800379  | -7.36672584  | -9.71435144  |
| H | 1.69958462  | -8.40157841  | -9.36927528  |
| H | 2.28344092  | -7.26902382  | -10.59923450 |
| H | 2.01167046  | -6.69289587  | -8.93156610  |
| P | -2.29269882 | -9.70290890  | -13.29829496 |
| C | -2.09522396 | -11.52140398 | -13.10654260 |
| H | -2.59913129 | -12.04814450 | -13.92361353 |

|    |              |              |              |
|----|--------------|--------------|--------------|
| H  | -2.53147740  | -11.83483670 | -12.15335125 |
| H  | -1.03246589  | -11.77201394 | -13.09812330 |
| C  | -4.11679541  | -9.48177020  | -13.37277206 |
| H  | -4.34572203  | -8.42686547  | -13.53772450 |
| H  | -4.55904694  | -9.78364819  | -12.41873764 |
| H  | -4.54201431  | -10.08998508 | -14.17784144 |
| C  | -1.73194820  | -9.37359718  | -15.02178866 |
| H  | -1.90787884  | -8.32246260  | -15.26791089 |
| H  | -0.66019319  | -9.57654191  | -15.10241793 |
| H  | -2.27386961  | -10.00702508 | -15.73239594 |
| C  | 1.11764920   | -10.65432394 | -11.38724189 |
| C  | -3.39366769  | -6.02631305  | -12.07263434 |
| C  | -2.56033560  | -6.91523364  | -11.95153494 |
| Pt | -1.15298455  | -8.35134758  | -11.73096487 |
| C  | 2.09757712   | -11.66878489 | -11.22233701 |
| C  | 4.85864675   | -17.03807856 | -8.54311915  |
| H  | 4.40282113   | -17.53654799 | -7.71326902  |
| C  | -8.32292772  | -1.79316011  | -13.26506023 |
| C  | -9.02369463  | -2.92419123  | -13.77128039 |
| C  | -9.33769511  | -2.88629552  | -15.15930757 |
| C  | -8.98141366  | -1.83997014  | -15.98658933 |
| C  | -8.25604725  | -0.73474432  | -15.47418551 |
| C  | -7.95653524  | -0.74591161  | -14.06632482 |
| H  | -8.08182242  | -1.76109893  | -12.20809273 |
| H  | -9.27752971  | -1.90346346  | -17.02394106 |
| H  | -7.44000344  | 0.09048762   | -13.61596093 |
| C  | -10.61324464 | -6.24678453  | -12.97142828 |
| C  | -11.30655230 | -7.22134393  | -13.63547861 |
| C  | -11.59487001 | -7.11514535  | -15.04181381 |
| C  | -11.14485790 | -5.94570841  | -15.70571534 |
| C  | -10.44260919 | -4.97817472  | -15.01569061 |
| C  | -10.15084015 | -5.06961221  | -13.62527809 |
| H  | -10.40625489 | -6.36923131  | -11.91427188 |
| H  | -11.63974833 | -8.08575751  | -13.07777275 |
| H  | -11.32634662 | -5.77467371  | -16.75724983 |
| O  | -10.03330240 | -3.90106378  | -15.74113126 |
| C  | -12.59558900 | -7.96359870  | -17.13123031 |
| H  | -11.71995909 | -7.57662135  | -17.66297991 |
| C  | -12.71895789 | -9.32100522  | -15.01599970 |
| H  | -11.93554317 | -9.65740204  | -14.33060583 |
| C  | -8.21137086  | 0.32062921   | -17.70368922 |
| H  | -8.04989657  | -0.67638373  | -18.12671342 |
| C  | -7.09562090  | 1.43579725   | -15.74341234 |
| H  | -6.35026270  | 1.06607037   | -15.03302642 |
| N  | -7.85525398  | 0.29004194   | -16.27453000 |
| N  | -12.25805647 | -8.10161642  | -15.70379095 |
| C  | -9.41814312  | -4.03937814  | -13.00119119 |

|   |              |              |              |
|---|--------------|--------------|--------------|
| C | -8.83304721  | -4.09004098  | -8.73728874  |
| C | -7.77473270  | -4.43800256  | -9.57510542  |
| C | -7.91874468  | -4.42426045  | -10.96930006 |
| C | -9.16789844  | -4.07414832  | -11.52677896 |
| C | -10.05940696 | -3.72420890  | -9.28974844  |
| H | -8.70144293  | -4.11574134  | -7.65989980  |
| H | -6.83773129  | -4.76344886  | -9.13235222  |
| H | -10.89090893 | -3.44929878  | -8.64781868  |
| C | -6.79935197  | -4.83245895  | -11.88939614 |
| O | -7.02662843  | -5.30693203  | -13.00254748 |
| N | -5.53013528  | -4.64462698  | -11.43042657 |
| H | -5.38174854  | -4.15166868  | -10.56245881 |
| C | -10.22367093 | -3.72212404  | -10.67547002 |
| H | -11.18079445 | -3.44092368  | -11.10547316 |
| H | -12.76089640 | -8.97246745  | -17.51704350 |
| H | -12.80289635 | -10.09966675 | -15.77858899 |
| C | -13.82684543 | -7.09362361  | -17.41098913 |
| H | -14.72729009 | -7.52457373  | -16.96323942 |
| H | -13.70487651 | -6.08002696  | -17.01678094 |
| H | -13.98851512 | -7.02165693  | -18.49196957 |
| C | -14.05517639 | -9.16854725  | -14.28051218 |
| H | -14.01014015 | -8.38273837  | -13.51969349 |
| H | -14.86462299 | -8.92134985  | -14.97391428 |
| H | -14.31257664 | -10.11020769 | -13.78368717 |
| C | -9.63646860  | 0.80762772   | -17.99234321 |
| H | -10.38699384 | 0.18186158   | -17.49958332 |
| H | -9.77951718  | 1.83763336   | -17.65244528 |
| H | -9.82385078  | 0.77856106   | -19.07115435 |
| C | -7.95763135  | 2.53031864   | -15.10387082 |
| H | -8.64382619  | 2.97313509   | -15.83201778 |
| H | -8.55306013  | 2.14195094   | -14.27134627 |
| H | -7.31381232  | 3.32873669   | -14.71928000 |
| H | -6.52937411  | 1.85292048   | -16.58025810 |
| H | -7.49018214  | 0.97737640   | -18.19634555 |
| C | -4.38308178  | -4.95421052  | -12.24289874 |
| H | -4.54447831  | -5.22340333  | -13.26582904 |
| H | -4.06634537  | -3.93362008  | -12.18837154 |

**RHO- Pt(open amide form) ground state configuration (B3LYP/6-31G/LANL2DZ)**

Symbolic Z-matrix:

Charge = 1 Multiplicity = 1

|   |            |              |              |
|---|------------|--------------|--------------|
| P | 1.90580966 | -11.05682066 | -12.30149220 |
| C | 1.99384760 | -9.27689899  | -12.75598459 |
| H | 2.49045316 | -8.71070947  | -11.96069332 |
| H | 0.98481273 | -8.88756725  | -12.91191004 |
| H | 2.56396695 | -9.16591794  | -13.68345669 |



|    |              |              |              |
|----|--------------|--------------|--------------|
| C  | 1.02080153   | -11.06202293 | -10.68709972 |
| H  | 1.00397691   | -12.07804746 | -10.28223043 |
| H  | -0.00892143  | -10.72876150 | -10.84155203 |
| H  | 1.51505638   | -10.39601395 | -9.97177913  |
| C  | 3.64101302   | -11.47362049 | -11.85732022 |
| H  | 3.69259385   | -12.50847306 | -11.51224406 |
| H  | 4.27645015   | -11.37591847 | -12.74220328 |
| H  | 4.00467969   | -10.79979052 | -11.07453488 |
| P  | -0.29968959  | -13.80980355 | -15.44126374 |
| C  | -0.10221473  | -15.62829863 | -15.24951138 |
| H  | -0.60612206  | -16.15503915 | -16.06658231 |
| H  | -0.53846817  | -15.94173135 | -14.29632003 |
| H  | 0.96054334   | -15.87890859 | -15.24109208 |
| C  | -2.12378618  | -13.58866485 | -15.51574084 |
| H  | -2.35271280  | -12.53376012 | -15.68069328 |
| H  | -2.56603771  | -13.89054284 | -14.56170642 |
| H  | -2.54900508  | -14.19687973 | -16.32081022 |
| C  | 0.26106103   | -13.48049183 | -17.16475744 |
| H  | 0.08513039   | -12.42935725 | -17.41087967 |
| H  | 1.33281604   | -13.68343656 | -17.24538671 |
| H  | -0.28086038  | -14.11391973 | -17.87536472 |
| C  | -1.40065846  | -10.13320770 | -14.21560312 |
| C  | -0.56732637  | -11.02212829 | -14.09450372 |
| Pt | 0.84002468   | -12.45824223 | -13.87393365 |
| C  | -6.32991849  | -5.90005476  | -15.40802901 |
| C  | -7.03068540  | -7.03108588  | -15.91424917 |
| C  | -7.34468588  | -6.99319017  | -17.30227635 |
| C  | -6.98840443  | -5.94686479  | -18.12955811 |
| C  | -6.26303802  | -4.84163897  | -17.61715429 |
| C  | -5.96352601  | -4.85280626  | -16.20929360 |
| H  | -6.08881319  | -5.86799358  | -14.35106151 |
| H  | -7.28452048  | -6.01035811  | -19.16690984 |
| H  | -5.44699421  | -4.01640703  | -15.75892971 |
| C  | -8.62023541  | -10.35367918 | -15.11439706 |
| C  | -9.31354307  | -11.32823858 | -15.77844739 |
| C  | -9.60186078  | -11.22204000 | -17.18478259 |
| C  | -9.15184867  | -10.05260306 | -17.84868412 |
| C  | -8.44959996  | -9.08506937  | -17.15865939 |
| C  | -8.15783092  | -9.17650686  | -15.76824687 |
| H  | -8.41324566  | -10.47612596 | -14.05724066 |
| H  | -9.64673910  | -12.19265216 | -15.22074153 |
| H  | -9.33333739  | -9.88156836  | -18.90021861 |
| O  | -8.04029317  | -8.00795843  | -17.88410004 |
| C  | -10.60257977 | -12.07049335 | -19.27419909 |
| H  | -9.72694986  | -11.68351600 | -19.80594869 |
| C  | -10.72594866 | -13.42789987 | -17.15896848 |
| H  | -9.94253394  | -13.76429669 | -16.47357461 |

|    |              |              |              |
|----|--------------|--------------|--------------|
| C  | -6.21836163  | -3.78626544  | -19.84665800 |
| H  | -6.05688734  | -4.78327838  | -20.26968220 |
| C  | -5.10261167  | -2.67109740  | -17.88638112 |
| H  | -4.35725347  | -3.04082428  | -17.17599520 |
| N  | -5.86224475  | -3.81685271  | -18.41749878 |
| N  | -10.26504724 | -12.20851107 | -17.84675973 |
| C  | -7.42513389  | -8.14627279  | -15.14415997 |
| C  | -6.84003798  | -8.19693563  | -10.88025752 |
| C  | -5.78172347  | -8.54489721  | -11.71807420 |
| C  | -5.92573545  | -8.53115510  | -13.11226884 |
| C  | -7.17488921  | -8.18104297  | -13.66974774 |
| C  | -8.06639773  | -7.83110355  | -11.43271722 |
| H  | -6.70843370  | -8.22263599  | -9.80286858  |
| H  | -4.84472206  | -8.87034351  | -11.27532100 |
| H  | -8.89789970  | -7.55619343  | -10.79078746 |
| C  | -4.80634274  | -8.93935360  | -14.03236492 |
| O  | -5.03361920  | -9.41382668  | -15.14551626 |
| N  | -3.53712605  | -8.75152163  | -13.57339535 |
| H  | -3.38873931  | -8.25856333  | -12.70542759 |
| C  | -8.23066170  | -7.82901869  | -12.81843880 |
| H  | -9.18778522  | -7.54781833  | -13.24844194 |
| H  | -10.76788717 | -13.07936210 | -19.66001228 |
| H  | -10.80988712 | -14.20656140 | -17.92155777 |
| C  | -11.83383620 | -11.20051826 | -19.55395791 |
| H  | -12.73428086 | -11.63146838 | -19.10620820 |
| H  | -11.71186728 | -10.18692161 | -19.15974972 |
| H  | -11.99550589 | -11.12855158 | -20.63493835 |
| C  | -12.06216716 | -13.27544190 | -16.42348096 |
| H  | -12.01713092 | -12.48963302 | -15.66266227 |
| H  | -12.87161376 | -13.02824450 | -17.11688306 |
| H  | -12.31956741 | -14.21710234 | -15.92665595 |
| C  | -7.64345937  | -3.29926693  | -20.13531199 |
| H  | -8.39398461  | -3.92503307  | -19.64255210 |
| H  | -7.78650795  | -2.26926129  | -19.79541406 |
| H  | -7.83084155  | -3.32833359  | -21.21412313 |
| C  | -5.96462212  | -1.57657601  | -17.24683960 |
| H  | -6.65081696  | -1.13375956  | -17.97498656 |
| H  | -6.56005090  | -1.96494371  | -16.41431505 |
| H  | -5.32080309  | -0.77815796  | -16.86224878 |
| H  | -4.53636488  | -2.25397417  | -18.72322688 |
| H  | -5.49717291  | -3.12951825  | -20.33931433 |
| C  | -2.39007255  | -9.06110517  | -14.38586752 |
| H  | -2.55146908  | -9.33029798  | -15.40879782 |
| H  | -2.07333614  | -8.04051473  | -14.33134032 |
| Cl | 2.43718583   | -14.06782644 | -13.63578463 |
